# Supplementary material
Source: PubMed Central journal article supplement (PMC9977737)
Supplement: 41416_2022_2094_MOESM1_ESM.pdf [file 41416_2022_2094_MOESM1_ESM.pdf]

## Supplementary materials

**Title of the article:** Offering HPV self-sampling kits: an updated meta-analysis of the effectiveness of strategies to increase participation in cervical cancer screening.

**Author list:** Stefanie Costa<sup>1,\*</sup>, Bo Verberckmoes<sup>2,3,\*</sup>, Philip E. Castle<sup>4,5</sup>, Marc Arbyn<sup>1,6</sup>

### Affiliations:

1. Unit of Cancer Epidemiology, Belgian Cancer Centre, Sciensano, Brussels Belgium.
  2. International Centre for Reproductive Health, Department of Public Health & Primary Care, Ghent University, Ghent, Belgium.
  3. Department of Obstetrics and Gynecology, Ghent University Hospital, Ghent, Belgium
  4. Division of Cancer Prevention, National Cancer Institute, Rockville, MD, USA
  5. Division of Cancer Epidemiology and Genetics, National Cancer Institute, MD, USA
  6. Department of Human Structure and Repair, Faculty of Medicine and Health Sciences, Ghent University, Ghent, Belgium
- \* These authors contributed equally to this work.

**Corresponding author:** Marc Arbyn, MD, MSc, PhD, Coordinator - Unit of Cancer Epidemiology,

Address: Belgian Cancer Centre, Sciensano, J. Wytsmanstreet 14, 1050, Brussels, Belgium.

Marc.Arbyn@sciensano.be

OrcID: 0000-0001-7807-5908

# Supplementary materials

## Table of Contents

|                                                                                                                                          |    |
|------------------------------------------------------------------------------------------------------------------------------------------|----|
| 1. Study protocol (including objectives, PICOS, bibliographic sources, literature search strings).....                                   | 3  |
| 1.1. Objectives .....                                                                                                                    | 3  |
| 1.1.1. Primary objectives .....                                                                                                          | 3  |
| 1.1.2. Secondary objectives .....                                                                                                        | 3  |
| 1.2. Clinical questions.....                                                                                                             | 3  |
| 1.3. PICOS components.....                                                                                                               | 4  |
| 1.3.1. Potential of strategies providing self-sampling to increase population coverage .....                                             | 4  |
| 1.4. Literature retrieval strings.....                                                                                                   | 5  |
| 1.4.1. Potential of strategies providing self-sampling to increase population coverage .....                                             | 5  |
| 2. PRISMA flow charts of study retrieval and selection.....                                                                              | 6  |
| 2.21. Meta-analysis on the response to the offer of self-sampling.....                                                                   | 6  |
| 4. Characteristics of the randomised trials comparing strategies including offering hrHPV self-sampling with control interventions ..... | 7  |
| 5. Assessment of risk of bias in randomised trials .....                                                                                 | 21 |
| 6. Participation in the experimental and control groups of RCTs.....                                                                     | 23 |
| 7. Participation in the experimental groups: Opt-in vs. Mail-to-all .....                                                                | 32 |
| 8. Specimen adequacy, test-positivity rate, follow-up adherence, detection of CIN2+ .....                                                | 36 |
| 9. References .....                                                                                                                      | 41 |

# **1. Study protocol (including objectives, PICOS, bibliographic sources, literature search strings)**

## **1.1. Objectives**

### **1.1.1. Primary objectives**

- update and summarize the most recent evidence on cervical cancer screening participation when under- or never-screened women are offered a self-sampling device for hrHPV testing;
- compare screening attendance when two different self-sampling invitation scenarios are used;

### **1.1.2. Secondary objectives**

- summarize new evidence when the invitation scenario involves women getting offered an hrHPV self-sample kit upon a visit to the primary care provider.
- compare sample adequacy and test-positivity rate in self-sample versus conventional screening strategies;
- explore adherence to follow-up and detection rate of cervical precancer and cancer in screen-positive women.

## **1.2. Clinical questions**

- 1) Is cervical cancer screening attendance higher when underscreened women are offered a self-sampling device for hrHPV-testing (experimental group) compared to routine invitations/reminders to contact a healthcare professional (HCP) for collection of a cervical specimen (control group).
- 2) How does attendance to screening vary when two different self-sampling invitation strategies are used.

## 1.3. PICOS components

### 1.3.1. Potential of strategies providing self-sampling to increase population coverage

**Population:** women who were irregularly screened, never screened or did not respond to one or more invitation/reminder letters recommending participation in conventional cervical cancer screening.

**Intervention:** providing a self-sampling device for collection of a vaginal sample, as a cervical screening method to be carried out by the women themselves.

I1: “Mail-to-All”: an invitation to participate in the study accompanied by an hrHPV self-sampling kit was directly sent to the women at their home addresses;

I2: “Opt-In”: offering women the possibility to obtain a self-sampling kit: women had to request the self-sampling kits to be received by mail or, alternatively, these could be collected from the local clinic/pharmacy;

I3: “Community mobilization and outreach”: community campaigns with outreach supported by mass media in which attending women were offered a self-sampling kit at the end of a sensibilization session as well as, an individualized self-sampling kit delivery approach in which community healthcare workers directly contacted women at their homes or work places

I4 “Direct offer at a healthcare service”: women were offered a self-sample at the end of an individual appointment (when they contact a health service for whatever reason) and were given the choice to do it on site in a private room or to take it home.

**Control action:**

C: Women were offered the possibility to obtain screening according to current clinical practice either after an invitation/reminder to visit a HCP or as result from opportunistic screening upon woman’s request or on HCP recommendation, without organized invitation

**Outcomes:**

O1: Response rate in experimental and control groups;

O2: Relative response rate (experimental /control groups); response difference (experimental /control groups);

O3: Relative response rate (opt-in /mail-to-all groups); response difference (opt-in /mail-to-all groups);

O4: proportion with inadequate sample test results among screened women;

O5: test-positivity rate among screened women with satisfactory sample;

O6: adherence to further follow-up among screen-test positive women;

O7: detection rate of CIN2+ among all women, screened women, screen-positive women who complied to follow-up.

**Studies:**

Randomized controlled trials.

## 1.4. Literature retrieval strings

### 1.4.1. Potential of strategies providing self-sampling to increase population coverage

#### In Pubmed-Medline

(Cervix OR cervical) AND (HPV OR papillomavirus) AND (self-sampling OR self sampling OR self-collection OR self collection) AND (screening OR coverage OR participation OR knowledge OR acceptance)

## 2. PRISMA flow charts of study retrieval and selection

### 2.21. Meta-analysis on the response to the offer of self-sampling

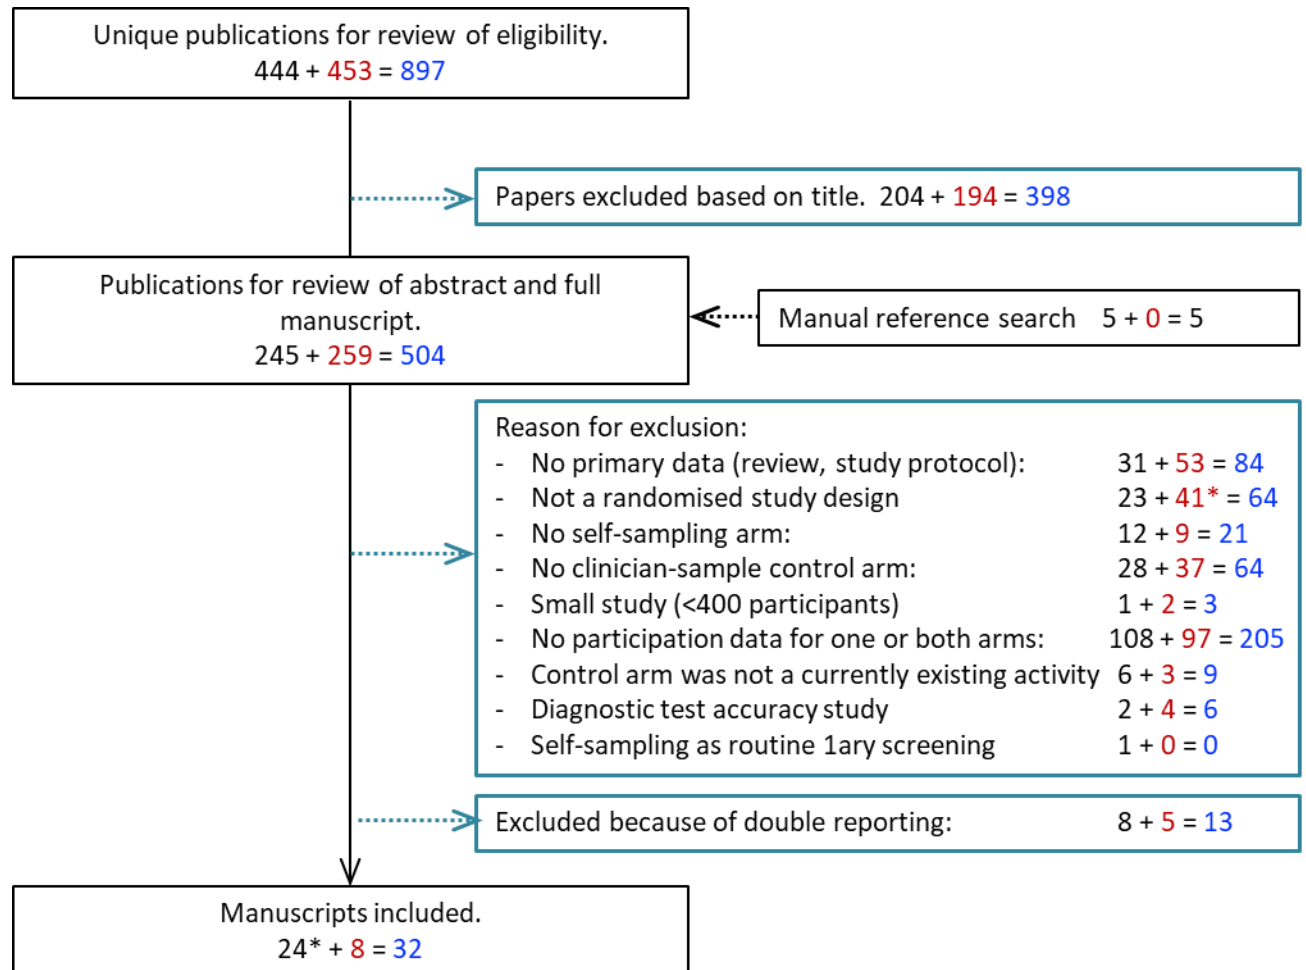

**Figure S1.** PRISMA flow chart summarizing the selection of eligible participation trials. Figures in black are those included in the search up to April 15, 2018<sup>1</sup>, those in red are references retrieved up to March 31, 2022. References in blue are the sum of all searches. \*One study (Zehbe et al, BMJ Open 2016)<sup>2</sup> included in the previous meta-analysis (Arbyn et al, BMJ 2018)<sup>1</sup> was excluded from the current update due to concerns raised with regards to the randomisation of women to the experimental and control intervention.

Throughout this Supplementary File, information regarding studies included in the previous meta-analysis of Arbyn et al. BMJ 2018<sup>1</sup> (retrieved until April 15, 2018) will be presented as black coloured text, whereas information on the studies newly included in this update (retrieved until March 31, 2022) will be presented in red coloured text.

## 4. Characteristics of the randomised trials comparing strategies including offering hrHPV self-sampling with control interventions

**Table S1.** Study characteristics of included RCTs fulfilling eligibility criteria.

| Author, year<br>Country                             | Study design and population                                                                                                                                                                                                     | Scenario of invitation<br>in self-sampling arm                                                                                                                                                                                                  | Scenario of invitation<br>in control arm                                                                                                   | N (Self-<br>sampling<br>arm)                  | N<br>(Control<br>arm) | Age<br>range<br>(years) |
|-----------------------------------------------------|---------------------------------------------------------------------------------------------------------------------------------------------------------------------------------------------------------------------------------|-------------------------------------------------------------------------------------------------------------------------------------------------------------------------------------------------------------------------------------------------|--------------------------------------------------------------------------------------------------------------------------------------------|-----------------------------------------------|-----------------------|-------------------------|
| <b>1. Bais, 2007<sup>3</sup></b><br>The Netherlands | Randomised.<br>Women who did not respond to the invitation for conventional screening and the first reminder 6 months later. No data on response stratified by screening history.                                               | Direct mailing of the self-sampling kit.*                                                                                                                                                                                                       | Invitation for conventional cytology with an explanatory letter.*                                                                          | Mail-to-all:<br>2,352                         | 272                   | 30-50                   |
| <b>2. Gok, 2010<sup>4</sup></b><br>The Netherlands  | Randomised.<br>Women who did not respond to the invitation for conventional screening and the first reminder 6 months later. Whole population: 1 <sup>st</sup> screen or screened 5 years ago. Subgroup: screened >7 years ago. | Direct mailing of the self-sampling kit, preceded by a notification.*                                                                                                                                                                           | Invitation for conventional cytology, preceded by a notification.*                                                                         | Mail-to-all:<br>26,886                        | 277                   | 30-60                   |
| <b>3. Giorgi-Rossi, 2011<sup>5</sup></b><br>Italy   | Randomised.<br>Women who did not respond to the invitation for conventional screening. No sufficient data on response stratified by screening history.                                                                          | - Direct mailing of the self-sampling kit, preceded by a notification.<br>- Women were offered the opportunity to receive the self-sampler device (by mail or picking it up at the clinic). If interested, they had to call a free toll number. | - Invitation for conventional cytology (prefixed date).<br>- Invitation for hrHPV testing at the clinic (sample collected by a clinician). | Mail-to-all:<br>616<br><br>Opt-in:<br>622     | - 619<br><br>- 616    | 35-65                   |
| <b>4. Lazcano-Ponce, 2011<sup>6</sup></b><br>Mexico | Randomised.<br>Women in poverty-reduction programme, with limited access to health services. No data on response stratified by screening history.                                                                               | Door-to-door recruitment. Nurses performed home visits, in which a self-sample was taken by the woman herself.                                                                                                                                  | Door-to-door recruitment. Nurses performed home visits, and made an appointment for conventional cytology in the clinic.                   | Community mobilization and outreach:<br>9,371 | 1,2731                | 25-65                   |

| <b>Author, year</b><br>Country                          | <b>Study design and population</b>                                                                                                                                                                      | <b>Scenario of invitation in self-sampling arm</b>                                                                              | <b>Scenario of invitation in control arm</b>                                                     | <b>N (Self-sampling arm)</b> | <b>N (Control arm)</b> | <b>Age range (years)</b> |
|---------------------------------------------------------|---------------------------------------------------------------------------------------------------------------------------------------------------------------------------------------------------------|---------------------------------------------------------------------------------------------------------------------------------|--------------------------------------------------------------------------------------------------|------------------------------|------------------------|--------------------------|
| <b>5. Piana, 2011<sup>7</sup></b><br>France             | Randomised.<br>Women who did not respond to the invitation for conventional screening and had not had a cervical smear in $\geq 2$ y.<br>No sufficient data on response stratified by screening history | Direct mailing of the self-sampling kit, preceded by a notification with an opt-out option.                                     | Invitation for conventional cytology.                                                            | Mail-to-all:<br>4,400        | 4,934                  | 35-69                    |
| <b>6. Szarewski, 2011<sup>8</sup></b><br>United Kingdom | Randomised.<br>Women who did not respond to $\geq 2$ invitations for conventional screening.<br>No data on response stratified by screening history                                                     | Direct mailing of the self-sampling kit. <sup>¥</sup>                                                                           | Invitation for conventional cytology. <sup>¥</sup>                                               | Mail-to-all:<br>1,500        | 1,500                  | 25-64                    |
| <b>7. Virtanen, 2011<sup>9</sup></b><br>Finland         | Randomised.<br>Women who did not respond to the invitation for conventional screening.<br>No sufficient data on response stratified by screening history.                                               | Direct mailing of the self-sampling kit, preceded by a notification (with an opt-out option).                                   | Invitation for conventional cytology (pre-fixed appointment).                                    | Mail-to-all:<br>2,397        | 6,302                  | 30-60                    |
| <b>8. Wikstrom, 2011<sup>10</sup></b><br>Sweden         | Randomised.<br>Women who had not participated in screening for $\geq 6$ years.<br>No data on response stratified by screening history.                                                                  | Direct mailing of the self-sampling kit, preceded by a notification. Afterwards an additional reminder to participate was sent. | Invitation for conventional cytology, within the framework of the organised screening programme. | Mail-to-all:<br>2,000        | 2,060                  | 39-60                    |
| <b>9. Gok, 2012<sup>11</sup></b><br>The Netherlands     | Randomised.<br>Women who did not respond to the invitation for conventional screening and the first reminder.<br>No data on response stratified by screening history.                                   | Direct mailing of the self-sampling kit, preceded by a notification.*                                                           | Invitation for conventional cytology, preceded by a notification.*                               | Mail-to-all:<br>25,561       | 261                    | 30-60                    |



| Author, year<br>Country                                 | Study design and population                                                                                                                                                                                                                                                                                    | Scenario of invitation<br>in self-sampling arm                                                                                                                                                                                                                         | Scenario of invitation<br>in control arm                                                                                                               | N (Self-<br>sampling<br>arm) | N<br>(Control<br>arm) | Age<br>range<br>(years) |
|---------------------------------------------------------|----------------------------------------------------------------------------------------------------------------------------------------------------------------------------------------------------------------------------------------------------------------------------------------------------------------|------------------------------------------------------------------------------------------------------------------------------------------------------------------------------------------------------------------------------------------------------------------------|--------------------------------------------------------------------------------------------------------------------------------------------------------|------------------------------|-----------------------|-------------------------|
| <b>10. Darlin, 2013</b> <sup>12</sup><br>Sweden         | Randomised.<br>Women who had not had any cervical smears taken for >9y.<br>No data on response stratified by screening history.                                                                                                                                                                                | Direct mailing of the self-sampling kit. After one month, a reminder including another self-sampling kit was sent to non-responders.                                                                                                                                   | Invitation for hrHPV testing at an outpatient clinic. The invitation included several alternative appointments. A reminder was sent to non-responders. | Mail-to-all:<br>1,000        | 500                   | 32-65                   |
| <b>11. Sancho-Garnier, 2013</b> <sup>13</sup><br>France | Randomised.<br>Women who did not respond to the invitation for conventional screening and had not had a cervical smear in $\geq 2$ y.<br>No data on response stratified by screening history.                                                                                                                  | Direct mailing of the self-sampling kit, preceded by a notification.                                                                                                                                                                                                   | Invitation for conventional cytology at an outpatient clinic. The invitation included a list of centres performing the test.                           | Mail-to-all:<br>8,829        | 9,901                 | 35-69                   |
| <b>12. Broberg, 2014</b> <sup>14</sup><br>Sweden        | Randomised.<br>Women who did not respond to $\geq 4$ invitations for conventional screening and did not have a registered Pap smear for $\geq 6$ y (30-53y), $\geq 7$ y (54y), or $\geq 8$ y (55-62y).<br>Data on response stratified by screening history: screened $\leq 10$ or $>10$ y ago; never screened. | Women were offered the opportunity to receive a self-sampling kit (by mail). If interested, they had to return a coupon using a postage-free envelope.<br>A reminder was sent if the kit was ordered but not returned, or after 10 weeks to women who did not respond. | No particular intervention was done. Women continued to receive annual invitations until a smear was registered.                                       | Opt-in:<br>800               | 4,000                 | 30-62                   |
| <b>13. Haguenoer, 2014</b> <sup>15</sup><br>France      | Randomised.<br>Women who had not had a cervical smear in $\geq 3$ y, and did not respond to the invitation for conventional screening.<br>No data on response stratified by screening history.                                                                                                                 | Direct mailing of the self-sampling kit.                                                                                                                                                                                                                               | - Invitation for conventional cytology.<br>- No intervention.                                                                                          | Mail-to-all:<br>1,999        | - 2,000<br>- 1,999    | 30-65                   |

| <b>Author, year</b><br>Country                          | <b>Study design and population</b>                                                                                                                                                                                          | <b>Scenario of invitation in self-sampling arm</b>                                                                                                       | <b>Scenario of invitation in control arm</b>                                                                                                                            | <b>N (Self-sampling arm)</b>                  | <b>N (Control arm)</b> | <b>Age range (years)</b> |
|---------------------------------------------------------|-----------------------------------------------------------------------------------------------------------------------------------------------------------------------------------------------------------------------------|----------------------------------------------------------------------------------------------------------------------------------------------------------|-------------------------------------------------------------------------------------------------------------------------------------------------------------------------|-----------------------------------------------|------------------------|--------------------------|
| <b>14. Arrossi, 2015</b> <sup>16</sup><br>Argentina     | Cluster randomised.<br>Women found at home.<br>No data on response stratified by screening history.                                                                                                                         | Door-to-door recruitment.<br>Community health workers performed home visits, in which a self-sample was taken by the woman herself.                      | Door-to-door recruitment. Community health workers performed home visits and advised women to go to a health centre for a clinician-collected sample for hrHPV testing. | Community mobilization and outreach:<br>3,049 | 4,018                  | ≥30                      |
| <b>15. Cadman, 2015</b> <sup>17</sup><br>United Kingdom | Randomised.<br>Women who did not respond to the invitation for conventional screening and the first reminder.<br>Data on response stratified by screening history: screened 0-3y, 3-5y, 5-10y and >10y ago; never screened. | Direct mailing of the self-sampling kit.                                                                                                                 | Invitation for conventional cytology.                                                                                                                                   | Mail-to-all:<br>3,000                         | 3,000                  | 25-65                    |
| <b>16. Giorgi-Rossi, 2015</b> <sup>18</sup><br>Italy    | Randomised.<br>Women who did not respond to the invitation for conventional screening.<br>No data on response stratified by screening history.                                                                              | - Direct mailing of the self-sampling kit, preceded by a notification.<br>- Women were invited by mail, to pick up a self-sampling device at the clinic. | - Invitation for conventional cytology at the clinic.<br>- Invitation for hrHPV testing at the clinic (sample collected by a clinician).                                | Mail-to-all:<br>4,516<br><br>Opt-in:<br>4,513 | - 1,998<br>- 3,014     | 30-64                    |
| <b>17. Moses, 2015</b> <sup>19</sup><br>Uganda          | Randomised.<br>Women who lived or worked in target city and had access to a mobile telephone. Door-to-door recruitment.<br>No data on response stratified by screening history.                                             | Women were provided a self-sampling kit at place of recruitment (home or workplace) and returned them to outreach workers.                               | Women were scheduled for VIA appointment and received a reminder call.                                                                                                  | Community mobilization and outreach:<br>248   | 245                    | 30-65                    |

| Author, year<br>Country                                    | Study design and population                                                                                                                                                                                                                        | Scenario of invitation<br>in self-sampling arm                                                                                                                                                                                             | Scenario of invitation<br>in control arm                                                                        | N (Self-<br>sampling<br>arm)                                           | N<br>(Control<br>arm)                                 | Age<br>range<br>(years)        |
|------------------------------------------------------------|----------------------------------------------------------------------------------------------------------------------------------------------------------------------------------------------------------------------------------------------------|--------------------------------------------------------------------------------------------------------------------------------------------------------------------------------------------------------------------------------------------|-----------------------------------------------------------------------------------------------------------------|------------------------------------------------------------------------|-------------------------------------------------------|--------------------------------|
| <b>18. Enerly, 2016</b> <sup>20</sup><br>Norway            | Cohort study with random selection of women who did not have cytology, hrHPV or histology in $\geq 3$ years. Targeted women attended information sessions. No data on response stratified by screening history.                                    | Direct mailing of the self-sampling kit, preceded by a notification with an opt-out option.                                                                                                                                                | Invitation (i.e., reminder) to complete liquid-based cytology sent to women not included in intervention group. | Mail-to-all:<br>800                                                    | 2,593                                                 | 26-69                          |
| <b>19. Racey, 2016</b> <sup>21</sup><br>Canada             | RCT. Women with current Ontario Health Insurance Program card and no cytology in $\geq 30$ months. No data on response stratified by screening history.                                                                                            | Direct mailing of the self-sampling kit, preceded by a notification with choice to opt-out. Reminder phone call 1 month after kits were mailed.                                                                                            | C1: Invitation letter to schedule cytology appointment<br>C2: No invitation (opportunistic screening)           | Mail-to-all:<br>335                                                    | C1: 331<br>C2: 152                                    | 30-70                          |
| <b>20. Sultana, 2016</b> <sup>22</sup><br>Australia        | RCT. Never-screened or under-screened women (not screened in the previous 2.5 years). Data on response stratified by screening history: screened $>2.5$ y ago; never screened.                                                                     | Direct mailing of the self-sampling kit, preceded by a notification with an opt-out option.                                                                                                                                                | Invitation (never-screened) or reminder (underscreened) letters for cytology.                                   | Mail-to-all:<br>14,153<br>(7,075 un-screened;<br>7,078 under-screened) | 2,025<br>(1,014 un-screened;<br>1,011 under-screened) | 30-69                          |
| <b>21. Kitchener, 2017</b> <sup>23</sup><br>United Kingdom | Cluster-randomised. Phase 2 of STRATEGIC trial. Women, due for their first invitation, who in phase 1 of STRATEGIC did not respond to invitation letters (with or without pre-leaflet or with/without online booking) to screening after 6 months. | - Direct mailing of unrequested self-sampling kits<br>- Direct mailing of requested self-sampling kits<br>- Offered women choice between nurse navigator and self-sampling kit ( <i>not considered for syst. rev &amp; meta-analysis</i> ) | No intervention beyond standard invitation.                                                                     | Mail-to-all:<br>1,141<br>(32 GPs)<br><br>Opt-in:<br>1,290<br>(66 GPs)  | 3,782<br>(101 GPs)                                    | 20 (Grampian); 25 (Manchester) |
| <b>22. Modibbo, 2017</b> <sup>24</sup><br>Nigeria          | RCT. Women living or working in target community not planning to move within 6 months. No data on response stratified by screening history.                                                                                                        | Women attending a community event received a self-sampling kit to complete at home and to mail or drop off at collection sites.                                                                                                            | Women attending a community event received a hospital hrHPV test appointment.                                   | Community mobilization and outreach:<br>200                            | 200                                                   | $\geq 30$                      |

| Author, year<br>Country                           | Study design and population                                                                                                                                                                                                                                                                                                                  | Scenario of invitation<br>in self-sampling arm                                                                                                                                                                                                                      | Scenario of invitation<br>in control arm                                                                                        | N (Self-<br>sampling<br>arm)                    | N<br>(Control<br>arm)                                | Age<br>range<br>(years) |
|---------------------------------------------------|----------------------------------------------------------------------------------------------------------------------------------------------------------------------------------------------------------------------------------------------------------------------------------------------------------------------------------------------|---------------------------------------------------------------------------------------------------------------------------------------------------------------------------------------------------------------------------------------------------------------------|---------------------------------------------------------------------------------------------------------------------------------|-------------------------------------------------|------------------------------------------------------|-------------------------|
| <b>23. Kellen, 2018<sup>25</sup></b><br>Belgium   | RCT. Population-based RCT with 2 experimental arms and 2 controls arms, including women without screening record since 8 years.<br>No data on response stratified by screening history.                                                                                                                                                      | -Reminder mailing with self-sampling kit (mail-to-all);<br>- Reminder mailing with self-sampling to be ordered (opt-in).                                                                                                                                            | - Reminder mailing inviting women to have a cytology specimen taken by a clinician (=routine intervention).<br>- No invitation. | Mail-to-all:<br>9,118.<br><br>Opt-in:<br>9,098. | Reminder letter:<br>8,830.<br>No reminder:<br>8,849. | 30-64                   |
| <b>24. Tranberg, 2018<sup>26</sup></b><br>Denmark | Population-based RCT with 1 control arm and 2 experimental arms (mail-to-all & opt-in) including women who did not reply to a 1 <sup>st</sup> invitation and were due to a 2 <sup>nd</sup> reminder. Nested in Danish screening programme.<br>Response rates stratified for regularly screened, under-screened and never screened subgroups. | - Reminder mailing with self-sampling kit;<br>- Reminder mailing with self-sampling to be ordered (opt-in).<br>Women were also offered the possibility to contact a GP for collection of cytology specimen.<br>For both arms: reminder letter if response after 4m. | Reminder mailing inviting women to have a cytology specimen taken by a clinician.                                               | Mail-to-all:<br>3,265.<br><br>Opt-in:<br>3,264. | 3,262                                                | 30-64                   |
| <b>25. Ivanus, 2018<sup>27</sup></b><br>Slovenia  | Randomised.<br>Women with no cytology results registered in the last 4 years and/or who had a hysterectomy.<br>Response rates stratified for level of protection as medium and no/low protection.                                                                                                                                            | - Direct mailing of the self-sampling kit<br>- Women were offered the opportunity to order a self-sampling kit<br>All participants had free access to cytology screening with their GP during the study.                                                            | No intervention beyond standard invitation.                                                                                     | Mail-to-all:<br>9,556<br><br>Opt-in:<br>14,400  | 2600                                                 | 34 - 64                 |

| Author, year<br>Country                          | Study design and population                                                                                                                                                                                                                                                                                                                      | Scenario of invitation<br>in self-sampling arm                                                                                                                                                                                                                                                                                                                                   | Scenario of invitation<br>in control arm                                                  | N (Self-<br>sampling<br>arm)                  | N<br>(Control<br>arm) | Age<br>range<br>(years) |
|--------------------------------------------------|--------------------------------------------------------------------------------------------------------------------------------------------------------------------------------------------------------------------------------------------------------------------------------------------------------------------------------------------------|----------------------------------------------------------------------------------------------------------------------------------------------------------------------------------------------------------------------------------------------------------------------------------------------------------------------------------------------------------------------------------|-------------------------------------------------------------------------------------------|-----------------------------------------------|-----------------------|-------------------------|
| <b>26. Elfström, 2019<sup>28</sup></b><br>Sweden | Randomised health services study.<br>Women who did not have a screening test on record for at least 10 years, or who had been sent at least 10 annual renewed invitations and who were not blocked from invitations due to hysterectomy or screening program opt-out.<br>No data on response stratified by screening history.                    | - Direct mailing of the self-sampling kit along with an invitation letter and instructions<br>- Women were offered the opportunity to order a self-sampling kit through an online application<br>- An invitation to call the region's coordinating midwife with potential questions and concerns regarding screening ( <i>not considered for syst. rev &amp; meta-analysis</i> ) | No intervention beyond standard invitation.                                               | Mail-to-all:<br>2,000<br><br>Opt-in:<br>2,000 | 2,000                 | 33 - 60                 |
| <b>27. Gizaw, 2019<sup>29</sup></b><br>Ethiopia  | Cluster Randomised.<br>Women who had never been screened. No previous hysterectomy.<br>No data on response stratified by screening history.                                                                                                                                                                                                      | Invitation to the primary healthcare unit for self-sampling, after sensitization at community/cluster level.                                                                                                                                                                                                                                                                     | Invitation to go to the hospital for VIA, after sensitization at community/cluster level. | Community mobilization and outreach:<br>1,213 | 1,143                 | 30 - 49                 |
| <b>28. Jalili, 2019<sup>30</sup></b><br>Canada   | Randomised.<br>Unscreened women: no Pap test in registry and who had been registered for 5+ years. Non-responders: women who had been sent an invitation letter to be screened, but who remained unscreened. No hysterectomy; or invasive gynaecologic cancer diagnosis in the registry.<br>No data on response stratified by screening history. | Direct mailing of the self-sampling kit + reminder letter after 8w for non-responders                                                                                                                                                                                                                                                                                            | No intervention beyond standard invitation.                                               | Mail-to-all:<br>529                           | 523                   | 30 - 65                 |

| Author, year<br>Country                                 | Study design and population                                                                                                                                                                                                                  | Scenario of invitation<br>in self-sampling arm                                                                                                                                                                                                                                                                 | Scenario of invitation<br>in control arm                                            | N (Self-<br>sampling<br>arm)                 | N<br>(Control<br>arm) | Age<br>range<br>(years) |
|---------------------------------------------------------|----------------------------------------------------------------------------------------------------------------------------------------------------------------------------------------------------------------------------------------------|----------------------------------------------------------------------------------------------------------------------------------------------------------------------------------------------------------------------------------------------------------------------------------------------------------------|-------------------------------------------------------------------------------------|----------------------------------------------|-----------------------|-------------------------|
| <b>29. Winer, 2019</b> <sup>31</sup><br>USA             | Randomised.<br>Women with health plan enrolment for 3 years and 5 months or longer, a primary care clinician, no Papanicolaou test within 3 years and 5 months, and no hysterectomy.<br>No data on response stratified by screening history. | Usual care + direct mailing of the self-sampling kit.<br><br>Participants, regardless of whether they chose to complete self-sampling, were advised to still receive Papanicolaou testing.                                                                                                                     | Usual care (annual patient reminders and ad hoc outreach from primary care clinics) | Mail-to-all:<br>9,960                        | 9,891                 | 30 - 64                 |
| <b>30. Lilliecreutz, 2020</b> <sup>31</sup><br>Sweden   | Randomised.<br>Women who did not respond to the invitation for conventional screening and had not had a cervical smear in 6y (ages 30-49) and 8y (ages 50-64)<br>No data on response stratified by screening history.                        | - Direct mailing of the self-sampling kit + annual invitation<br>- Annual screening invitation + telephone call with a midwife (within a month since invitation) offering the choice between a visit for a pap smear or an HPV self-sampling test ( <i>not considered for syst. rev &amp; meta-analysis</i> ). | No intervention beyond standard invitation..                                        | Mail-to-all:<br>3,068                        | 3,538                 | 30 - 64                 |
| <b>31. MacDonald, 2021</b> <sup>33</sup><br>New Zealand | Cluster randomised.<br>Women who had not had a cervical smear in $\geq 4$ y.<br>No data on response stratified by screening history.                                                                                                         | Direct offer of the self-sampling kit when attending the intervention clinics.<br>Participants randomised to receive the intervention could opt for a clinician taken HPV test or cervical smear.                                                                                                              | Offering a cervical smear when attending the control clinics.                       | Direct offer at a healthcare service:<br>364 | 174                   | 25 - 69                 |

| Author, year<br>Country                              | Study design and population                                                                                                                                                                            | Scenario of invitation<br>in self-sampling arm                                                                                                                               | Scenario of invitation<br>in control arm                                                                                                   | N (Self-<br>sampling<br>arm)                | N<br>(Control<br>arm) | Age<br>range<br>(years) |
|------------------------------------------------------|--------------------------------------------------------------------------------------------------------------------------------------------------------------------------------------------------------|------------------------------------------------------------------------------------------------------------------------------------------------------------------------------|--------------------------------------------------------------------------------------------------------------------------------------------|---------------------------------------------|-----------------------|-------------------------|
| <b>32. Brewer, 2021</b> <sup>34</sup><br>New Zealand | Randomised.<br>Never- and under-screened (no screening recorded for at least the last 5 years prior to enrolment) women from Maori, Pacific, and Asian ethnicities, registered at selected GP clinics. | - Direct mailing of the self-sampling kit, preceded by a notification<br>- Direct offer of the self-sampling kit at their usual general practice, preceded by a notification | Invitation for conventional cytology (at a clinic, at an independent service providers, or with a study nurse), preceded by a notification | Mail-to-all:<br>1467<br><br>Opt-in:<br>1574 | 512                   | 30 - 69                 |
| <b>33. Veerus, 2021</b> <sup>35</sup><br>Estonia†    | Randomised.<br>Never- and under-screened (no screening recorded from 2013-2019), women born between 1958-1983.                                                                                         | - Direct mailing of the self-sampling kit<br>- Women were offered the opportunity to order a self-sampling kit from a website                                                | /                                                                                                                                          | Mail-to-all:<br>4000<br><br>Opt-in:<br>8000 | /                     | 37-62                   |

\* A telephone helpline and/or website with information was available throughout the study.

‡ Study information was available in different languages as hard copy and on the internet.

Abbreviations: BHU: Basic Health Unit; GP: general practitioner; HPV: human papillomavirus; PG: personal gynaecologist; RCT: randomised controlled trial; SRH: sexual and reproductive health; SS: self-sampling; VIA: visual inspection with acetic acid.

† This study consisting of 2 experimental arms (different hrHPV self-sampling invitation scenarios) was not accounted for in the analysis comparing participation in self-sampling vs control groups.

**Table S2.** Test, triage & follow-up characteristics of RCTs fulfilling eligibility criteria.

| Author, year                                | Tests         | Self-sampling device          | Time of response assessment (months after invitation) | Triage of test+                                    | Follow-up                                                                                                                                                                                                                                          |
|---------------------------------------------|---------------|-------------------------------|-------------------------------------------------------|----------------------------------------------------|----------------------------------------------------------------------------------------------------------------------------------------------------------------------------------------------------------------------------------------------------|
| <b>1. Bais, 2007</b><br>Netherlands         | PCR (GP5+/6+) | Cervicovaginal brush          | 6m                                                    | No triage                                          | ▪ Cytology + colposcopy + colpo-directed biopsy, in case of positive screen-test                                                                                                                                                                   |
| <b>2. Gök, 2010</b><br>Netherlands          | HC2           | Lavage (Delphi screener)      | 12m                                                   | Self-arm: cytology + repeat HPV                    | ▪ Colposcopy + colpo-directed biopsy, in case of ASC-US+<br>▪ Repeat testing (Pap + hrHPV) in 1y, in case of normal cytology or no cytology performed                                                                                              |
| <b>3. Giorgi-Rossi, 2011</b><br>Italy       | HC2           | Lavage                        | 3m                                                    | No triage                                          | ▪ Colposcopy + colpo-directed biopsy, in case of screen test+ and positive colposcopy<br>▪ Colposcopy + cytology in 1y, in case of screen test+ and negative colposcopy                                                                            |
| <b>4. Lazcano-Ponce, 2011</b><br>Mexico     | HC2           | Cervicovaginal brush (Digene) | Not documented                                        | No triage                                          | ▪ Colposcopy (free of charge) + colpo-directed biopsy, in case of screen test+                                                                                                                                                                     |
| <b>5. Piana, 2011</b><br>France             | PCR           | Not documented                | Not documented                                        | No triage                                          | ▪ Cytology and colposcopy + colpo-directed biopsy                                                                                                                                                                                                  |
| <b>6. Szarewski, 2011</b><br>United Kingdom | HC2           | Swab                          | 6m                                                    | Cytology                                           | ▪ Colposcopy + colpo-directed biopsy, in case of triage test+ (or triage test-, by choice) (self-sampling arm) or screening test+ (control arm).                                                                                                   |
| <b>7. Virtanen, 2011</b><br>Finland         | HC2           | Lavage (Delphi screener)      | Not documented                                        | - <40y: cytology + repeat HPV<br>- ≥40y: no triage | ▪ <40y: Colposcopy + colpo-directed biopsy, in case of at least one positive triage test. Repeat testing (cytology + hrHPV) in 1y, in case of normal triage test.<br>▪ ≥40y: colposcopy + colpo-directed biopsy, in case of a positive screen test |
| <b>8. Wikström, 2011</b><br>Sweden          | HC2           | Swab                          | 12m                                                   | No triage                                          | ▪ Self-arm: Colposcopy + biopsy; or cytology (with/without repeat hrHPV)<br>▪ Control arm: Colposcopy + biopsy, in case of HSIL+; repeat cytology in case of ASC-US or LSIL                                                                        |
| <b>9. Gök, 2012</b><br>Netherlands          | HC2           | Cervicovaginal brush          | 12m                                                   | Cytology                                           | ▪ Colposcopy + colpo-directed biopsy, in case of ASC-US+<br>▪ Repeat testing (Pap + hrHPV) in 1y, in case of normal cytology                                                                                                                       |



| Author, year                              | Tests                          | Self-sampling device     | Time of response assessment (months after invitation) | Triage of test+                                                                                | Follow-up                                                                                                                                                                                                                                                                                                                                  |
|-------------------------------------------|--------------------------------|--------------------------|-------------------------------------------------------|------------------------------------------------------------------------------------------------|--------------------------------------------------------------------------------------------------------------------------------------------------------------------------------------------------------------------------------------------------------------------------------------------------------------------------------------------|
| <b>10. Darlin, 2013</b><br>Sweden         | PCR (GP5+/6+)                  | Not documented           | Not documented                                        | No triage                                                                                      | ▪ Colposcopy + colpo-directed biopsy and LBC, in case of hrHPV.                                                                                                                                                                                                                                                                            |
| <b>11. Sancho-Garnier, 2013</b><br>France | Abbott RT PCR                  | Swab (Dacron)            | Not documented                                        | Cytology                                                                                       | ▪ Colposcopy + colpo-directed biopsy, in case of LSIL+                                                                                                                                                                                                                                                                                     |
| <b>12. Broberg, 2014</b><br>Sweden        | HC2                            | Plastic swab (QvinTip)   | Not documented                                        | No triage                                                                                      | ▪ Colposcopy + colpo-directed biopsy, in case of hrHPV+ and/or abnormal cytology.                                                                                                                                                                                                                                                          |
| <b>13. Haguenoer, 2014</b><br>France      | INNO-LiPa                      | Dry nylon flocked swab.  | 9m<br>12m                                             | Cytology                                                                                       | ▪ Colposcopy + colpo-directed biopsy in case of ASC-US+                                                                                                                                                                                                                                                                                    |
| <b>14. Arrossi, 2015</b><br>Argentina     | HC2                            | Cervical brush (Qiagen)  | 6m                                                    | Self arm: no triage<br>Control arm: cytology                                                   | ▪ Colposcopy + colpo-directed biopsy, in case of hrHPV+ (self-sampling arm) or in case of hrHPV+ and ASC-US+ (control arm).                                                                                                                                                                                                                |
| <b>15. Cadman, 2015</b><br>United Kingdom | HC2                            | Dacron Swab              | 3m                                                    | Cytology                                                                                       | ▪ Colposcopy + colpo-directed biopsy, in case of abnormal cytology.                                                                                                                                                                                                                                                                        |
| <b>16. Giorgi-Rossi, 2015</b><br>Italy    | HC2                            | Lavage (Delphi screener) | 3m                                                    | Primary HPV: cytology (3/6 study centers), or no triage (3/6).<br>Primary cytology: no triage. | ▪ Colposcopy + colpo-directed biopsy in case of ASC-US+ (cytology triage, or primary cytology). Repeat HPV in case of normal cytology.<br>▪ Cytology, and colposcopy + colpo-directed biopsy in case of hrHPV+ (no triage). Repeat double testing in 3-6 months in case of normal colposcopy and HSIL, otherwise repeat testing in 1 year. |
| <b>17. Moses, 2015</b><br>Uganda          | Ecoli s.r.o real-time PCR test | Dacron swab              | Not documented                                        | VIA                                                                                            | ▪ Self arm: cryotherapy at VIA appointment, or colposcopy with treatment when indicated.<br>▪ VIA arm: cryotherapy at the time of screening. Referral for colposcopy and treatment when lesions were not appropriate for cryotherapy or when VIA was unsatisfactory.                                                                       |

| Author, year                                 | Tests                                                                | Self-sampling device                                 | Time of response assessment (months after invitation) | Triage of test+                                                            | Follow-up                                                                                                                                                          |
|----------------------------------------------|----------------------------------------------------------------------|------------------------------------------------------|-------------------------------------------------------|----------------------------------------------------------------------------|--------------------------------------------------------------------------------------------------------------------------------------------------------------------|
| <b>18. Enerly, 2016</b><br>Norway            | CLART HPV2 test, HC2                                                 | Lavage (Delphi screener) / Evalyn brush (randomised) | Not documented                                        | Self arm: cytology or hrHPV testing<br>Control arm: cytology               | hrHPV+ on self-sample: scheduled appointment for collection of a cervical specimen that was co-tested (cytology & hr HPV).                                         |
| <b>19. Racey, 2016</b><br>Canada             | NML Luminex (linear array)                                           | Dacron swab                                          | Not documented                                        | Cytology                                                                   | Standard of care                                                                                                                                                   |
| <b>20. Sultana, 2016</b><br>Australia        | Cobas 4800                                                           | Nylon-tipped flocced swab                            | 6m                                                    | HPV 16/18: no triage (directly to colposcopy)<br>HPV other types: cytology | Colposcopy with biopsy                                                                                                                                             |
| <b>21. Kitchener, 2017</b><br>United Kingdom | Cobas 4800                                                           | Lavage (Delphi Screener)/ Evalyn Brush               | 3m<br>6m<br>12m<br>18m                                | Cytology                                                                   | Colposcopy if triage by cytology was positive. Usual triage as recommended in NHS programme if cytology positive in control arm. No triage results were presented. |
| <b>22. Modibbo, 2017</b><br>Nigeria          | GP5+/6+-EIA PCR with LMNX genotyping                                 | Dry flocced swab                                     | 1m                                                    | Not documented                                                             | Treatment and follow-up                                                                                                                                            |
| <b>23. Kellen, 2018</b><br>Belgium           | RIATOL qPCR                                                          | Qvintip                                              | 12m                                                   | Cytology                                                                   | Not documented.                                                                                                                                                    |
| <b>24. Tranberg, 2018</b><br>Denmark         | Self arm: Cobas 4800.<br>Control arm: cytology, Cobas 4800 if 60-64y | Evalyn Brush                                         | 6m                                                    | Self arm: cytology                                                         | Follow-up as defined in Danish programme: ASC-US/HPV+ & LSIL+ referred to colposcopy. If self HPV+ & NILM at 1 <sup>st</sup> triage: repeat cytology & HPV at 12m. |

| Author, year                                       | Tests          | Self-sampling device                                                                                 | Time of response assessment (months after invitation) | Triage of test+                                                                                      | Follow-up                                                                                                                                                                                                   |
|----------------------------------------------------|----------------|------------------------------------------------------------------------------------------------------|-------------------------------------------------------|------------------------------------------------------------------------------------------------------|-------------------------------------------------------------------------------------------------------------------------------------------------------------------------------------------------------------|
| <b>25. Ivanus, 2018</b><br>Slovenia                | HC2            | Mail-to-all: Qvintip (Swab), HerSwab (Swab) and Delphi Screener (Lavage).<br>Opt-in: Qvintip (Swab). | 12m                                                   | No triage                                                                                            | Colposcopy + colpo-directed biopsy (if abnormal colposcopy result), in case of hrHPV+ and/or abnormal cytology.                                                                                             |
| <b>26. Elfstrom, 2019</b><br>Sweden                | Cobas 4800     | Cobas PCR Swab                                                                                       | 3m                                                    | Mail-to-all & opt-in group<br>hrHPV positive: No triage<br>In any arm: cytology                      | Mail-to-all & opt-in hrHPV+: pelvic exam, cytology + colposcopy + colpo-directed biopsy. Screen-positive women were managed in accordance with the program's standard guidelines and clinical presentation. |
| <b>27. Gizaw, 2019</b><br>Ethiopia                 | PCR(GP5+/GP6+) | Evalyn Brush                                                                                         | Not documented                                        | hrHPV+: VIA                                                                                          | See&treat approach (cryotherapy)                                                                                                                                                                            |
| <b>28. Jalili, 2019</b><br>Canada                  | Cobas 4800     | FLOQSwab                                                                                             | 6m                                                    | No triage                                                                                            | Colposcopy, in case of hrHPV+ and/or abnormal cytology.                                                                                                                                                     |
| <b>29. Winer, 2019</b><br>United States of America | Cobas 4800     | Not documented                                                                                       | 6m                                                    | Positive HPV-16 or 18: no triage<br>Negative/unsatisfactory/hr HPV other than HPV-16 or 18: cytology | HPV-16 or 18: immediate colposcopy.                                                                                                                                                                         |
| <b>30. Lilliecreutz, 2020</b><br>Sweden            | Cobas 4800     | Cobas PCR Swab                                                                                       | 6m                                                    | hrHPV+: no triage                                                                                    | Colposcopy + colpo-directed biopsy, in case of hrHPV+ and/or abnormal cytology.                                                                                                                             |

| Author, year                              | Tests                                                    | Self-sampling device              | Time of response assessment (months after invitation) | Triage of test+                                                                                      | Follow-up                                               |
|-------------------------------------------|----------------------------------------------------------|-----------------------------------|-------------------------------------------------------|------------------------------------------------------------------------------------------------------|---------------------------------------------------------|
| <b>31. MacDonald, 2021</b><br>New Zealand | Abbott Real-time High-Risk HPV assay                     | Nylon-tipped flocced swab (Copan) | Not documented                                        | No triage                                                                                            | Colposcopy, in case of hrHPV+                           |
| <b>32. Brewer, 2021</b><br>New Zealand    | Cobas 4800                                               | FLOQSwab                          | 3m                                                    | Positive HPV-16 or 18: no triage<br>Negative/unsatisfactory/hr HPV other than HPV-16 or 18: cytology | Colposcopy, in case of hrHPV+ and/or abnormal cytology. |
| <b>33. Veerus, 2021</b><br>Estonia†       | Alinity m hrHPV Assay (Cobas 4800 on inadequate samples) | Qvintip and Evalynbrush           | Not documented                                        | hrHPV+: cytology                                                                                     | Colposcopy, in case of abnormal cytology                |

Abbreviations: ASC-US+: atypical squamous cells of undetermined significance or more severe results; EIA: enzyme immunoassay; HC2: Hybrid Capture 2; hrHPV: high-risk human papillomavirus; HSIL+: high-grade squamous intraepithelial lesions or more severe disease; LBC: Liquid-based cytology; LMNX: Luminex; LSIL+: low-grade squamous intraepithelial lesions or more severe disease; PCR: polymerase chain reaction; NHS: National Health Service; NILM: negative for intraepithelial lesion or malignancy; NML: Canadian National Microbiology Laboratory; RCT: randomised controlled trial; VIA: visual inspection with acetic acid.

† This study consisting of 2 experimental arms (different hrHPV self-sampling invitation scenarios) was not accounted for in the analysis comparing participation in self-sampling vs control groups.

## 5. Assessment of risk of bias in randomised trials

**Table S3.** Summary of the quality of included studies, according to the Cochrane Tool for Risk of Bias<sup>36</sup>.

| Risk of Bias              | Selection                  |                        | Attrition               | Reporting              |                     |
|---------------------------|----------------------------|------------------------|-------------------------|------------------------|---------------------|
|                           | Random sequence generation | Allocation concealment | Incomplete outcome data | Reporting of timelines | Selective reporting |
| Bais, 2007                | Low                        | Medium                 | Low                     | Low                    | Low                 |
| Gok, 2010                 | Low                        | Medium                 | Low                     | Low                    | Low                 |
| Giorgi-Rossi, 2011        | Low                        | Low                    | Low                     | Low                    | Low                 |
| Lazcano-Ponce, 2011       | Medium*                    | Low                    | Low                     | Medium                 | Medium <sup>¥</sup> |
| Piana, 2011               | Low                        | Medium                 | Low                     | Medium                 | High <sup>¥□</sup>  |
| Szarewski, 2011           | Medium <sup>△</sup>        | Medium                 | Low                     | Low                    | Low                 |
| Virtanen, 2011            | Low                        | Medium                 | Low                     | Low                    | Low                 |
| Wikstrom, 2011            | Medium <sup>△</sup>        | Medium                 | Low                     | Low                    | Low                 |
| Gok, 2012                 | Low                        | Medium                 | Low                     | Low                    | Medium <sup>¥</sup> |
| Darlin, 2013              | Medium <sup>△</sup>        | Medium                 | Low                     | Medium                 | Medium <sup>¥</sup> |
| Sancho-Garnier, 2013      | Medium <sup>△</sup>        | Medium                 | Low                     | Low                    | Medium <sup>¥</sup> |
| Broberg, 2014             | Medium <sup>△</sup>        | Medium                 | Low                     | Medium                 | Low                 |
| Haguenoer, 2014           | Low                        | Low                    | Low                     | Low                    | Low                 |
| Arrossi, 2015             | Medium*                    | Low                    | Low                     | Low                    | Low                 |
| Cadman, 2015              | Low                        | Low                    | Low                     | Low                    | Low                 |
| Giorgi Rossi, 2015        | Low                        | Low                    | Low                     | Low                    | Low                 |
| Moses, 2015               | Low                        | Low                    | Low                     | Medium                 | Low                 |
| Enerly, 2016              | High <sup>δ</sup>          | High                   | Low                     | Low                    | Medium              |
| Racey, 2016               | Low                        | Low                    | Low                     | Medium                 | Low                 |
| Sultana, 2016             | Low                        | Low                    | Low                     | Low                    | Medium              |
| Kitchener, 2017           | Medium                     | Medium                 | Low                     | Low                    | Low                 |
| Modibbo, 2017             | High <sup>α</sup>          | Medium                 | Low                     | Low                    | Medium <sup>¥</sup> |
| Kellen, 2018              | Low                        | High <sup>ε</sup>      | Low                     | Low                    | Medium <sup>ε</sup> |
| Tranberg, 2018            | Low                        | Low                    | Low                     | Low                    | Low                 |
| Ivanus, 2018              | Low                        | Low                    | Low                     | Low                    | Low                 |
| Elfstrom, 2019            | Low                        | Low                    | Low                     | Low                    | Low                 |
| Gizaw, 2019               | Medium*                    | Low                    | Low                     | Medium                 | Medium <sup>¥</sup> |
| Jalili, 2019              | Medium <sup>△</sup>        | Low                    | Low                     | Low                    | Low                 |
| Winer, 2019               | Medium <sup>△</sup>        | Low                    | Low                     | Low                    | Low                 |
| Lillicreutz, 2020         | Low                        | Low                    | Low                     | Low                    | Low                 |
| MacDonald, 2021           | Medium*                    | Low                    | Low                     | Medium                 | Low                 |
| Brewer, 2021              | Low                        | Low                    | Low                     | Low                    | Medium <sup>¥</sup> |
| Veerus, 2021 <sup>†</sup> | Low                        | Low                    | Low                     | Medium                 | Low                 |

High=high risk of bias, Low=low risk of bias, Medium=intermediate risk of bias.

\* Non-random factor is included in design. (Women assigned to the self-sampling arm who were found not at home, were reassigned to cytology.)

<sup>△</sup> Details of the randomisation process are not documented.

<sup>¥</sup> Intention-to-treat analysis was not reported. If there were women who went to the clinic for conventional screening, after being invited for self-sampling, it was not documented.

<sup>□</sup> Women in the self-sampling arm could opt-out, and those who did were excluded from the analysis (possibly leading to an artificially high participation rate in the self-sampling arm).

\* Cluster-randomisation of community health workers/ Health Units to self-sampling and control arm.

<sup>Ω</sup> Intention-to-treat analysis unclear (nbs < than per protocol analysis)

<sup>δ</sup> Non-random factors in design. Investigators used randomisation to identify 800 screening non-attenders (300 each from age groups 26–34 and 35–49 years, and 200 from the age group 50–69 years). The remaining non-attenders in the study area screening programme were considered the control group.

<sup>α</sup> Randomisation occurred after enrolment.

<sup>ε</sup> Timing of invitation in experimental arms was different from invitation in the first control arm; compliance with cytology triage and detection rate of CIN2+ not reported.

<sup>μ</sup> Monthly-alternation as randomisation method was used to allocate women to the experimental or control arm.

<sup>†</sup> This study consisting of 2 experimental arms (different hrHPV self-sampling invitation scenarios) is only included for the secondary analysis and was not accounted for in the main analysis.

## 6. Participation in the experimental and control groups of RCTs

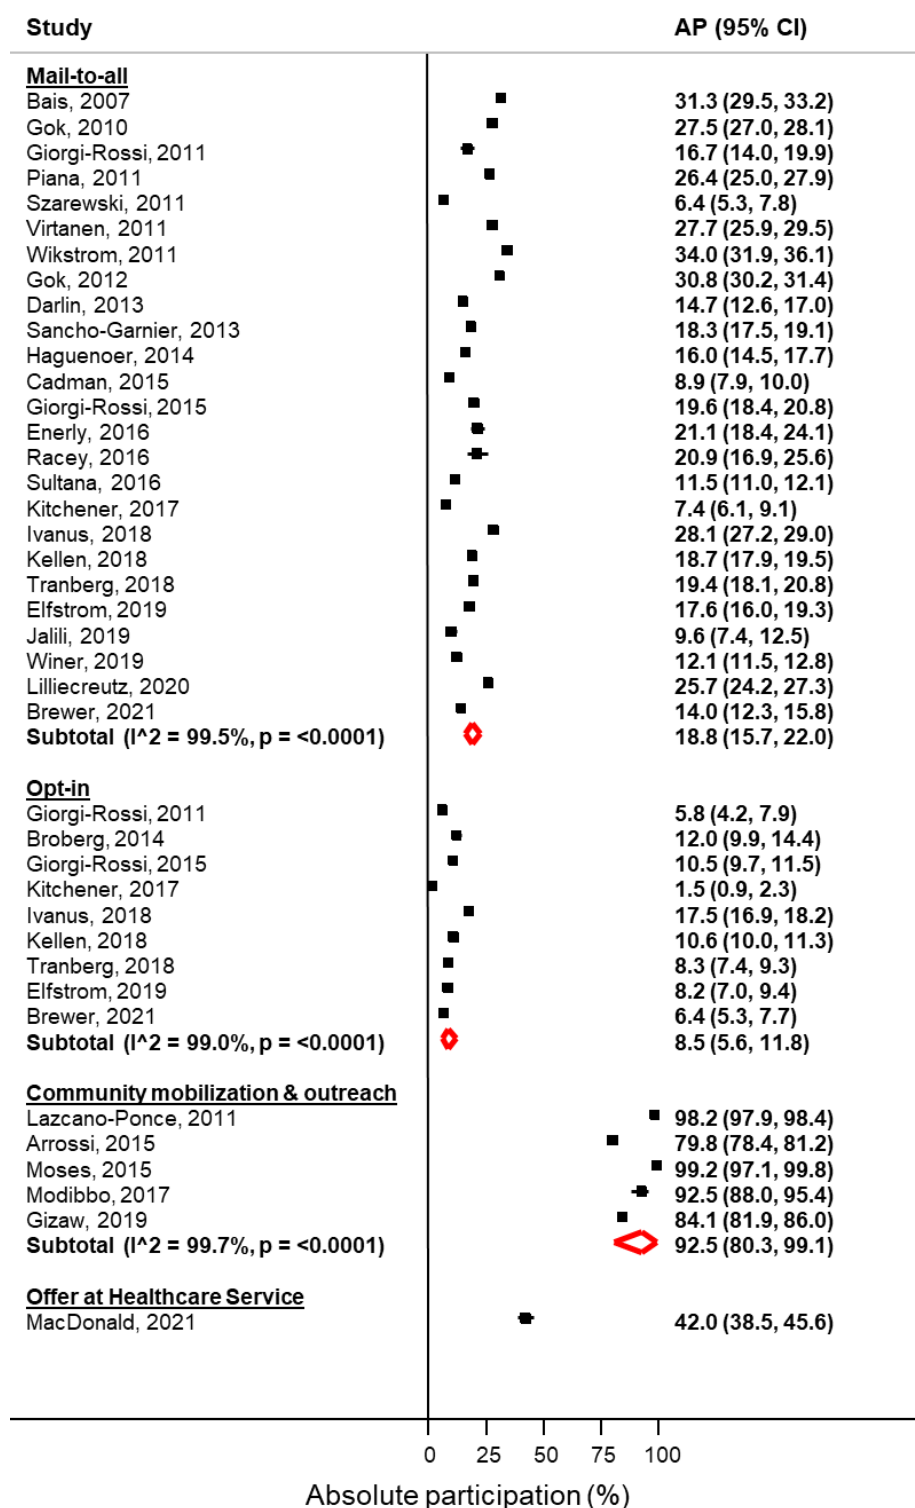

**Figure S2.** Participation rate in the experimental groups of randomised trials: per-protocol (PP) analysis. Only hrHPV tests on self-samples were accounted for.

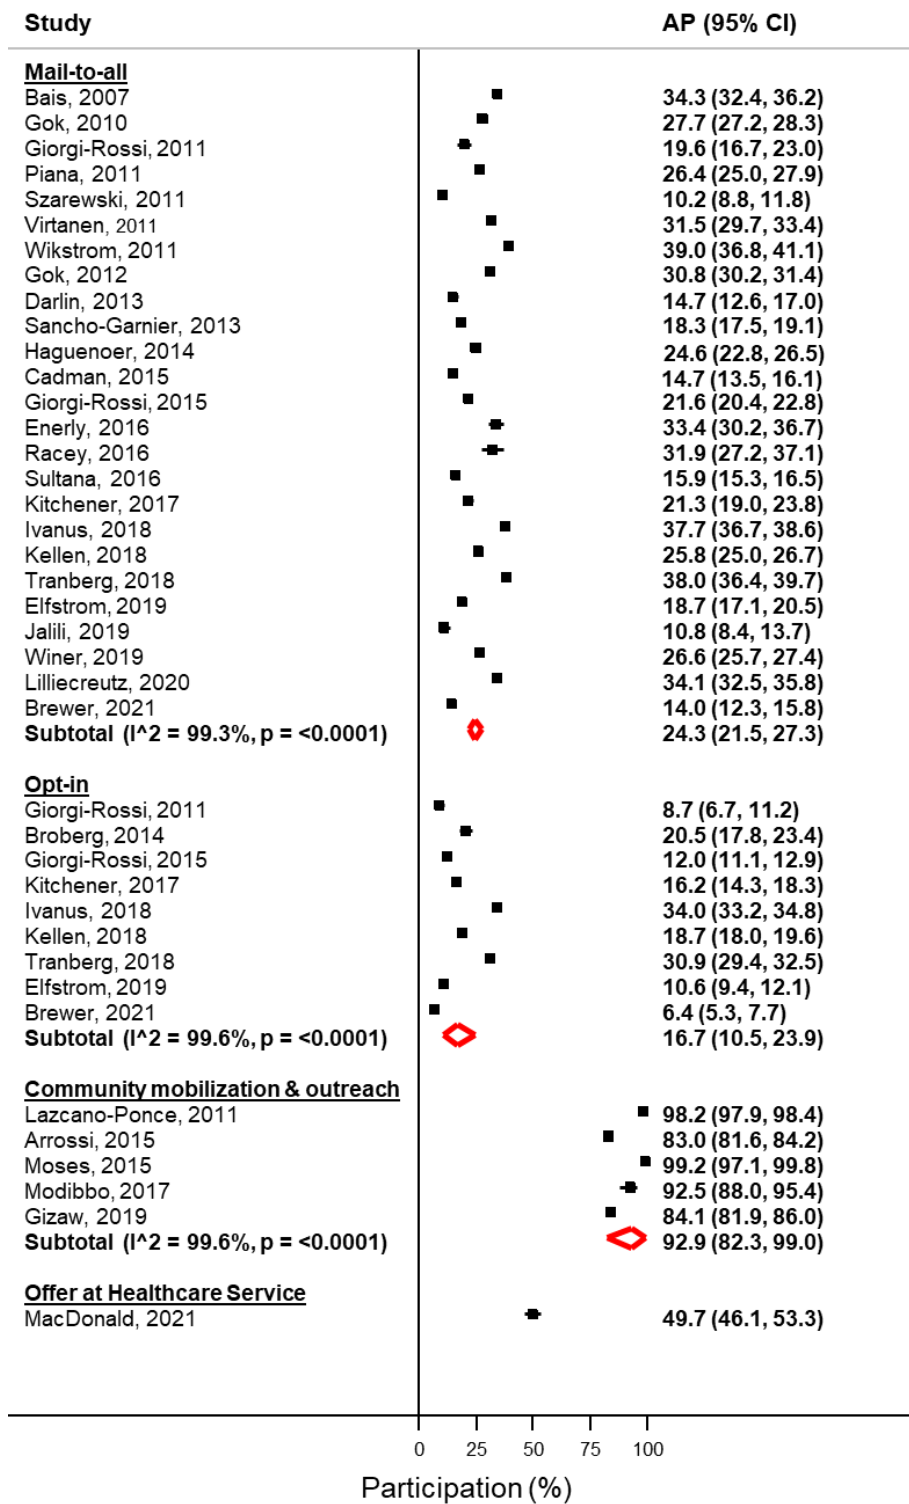

**Figure S3.** Participation rate in the experimental groups of randomised trials: intention-to-treat (ITT) analysis. Both, hrHPV tests on self-samples and Pap smears were accounted.



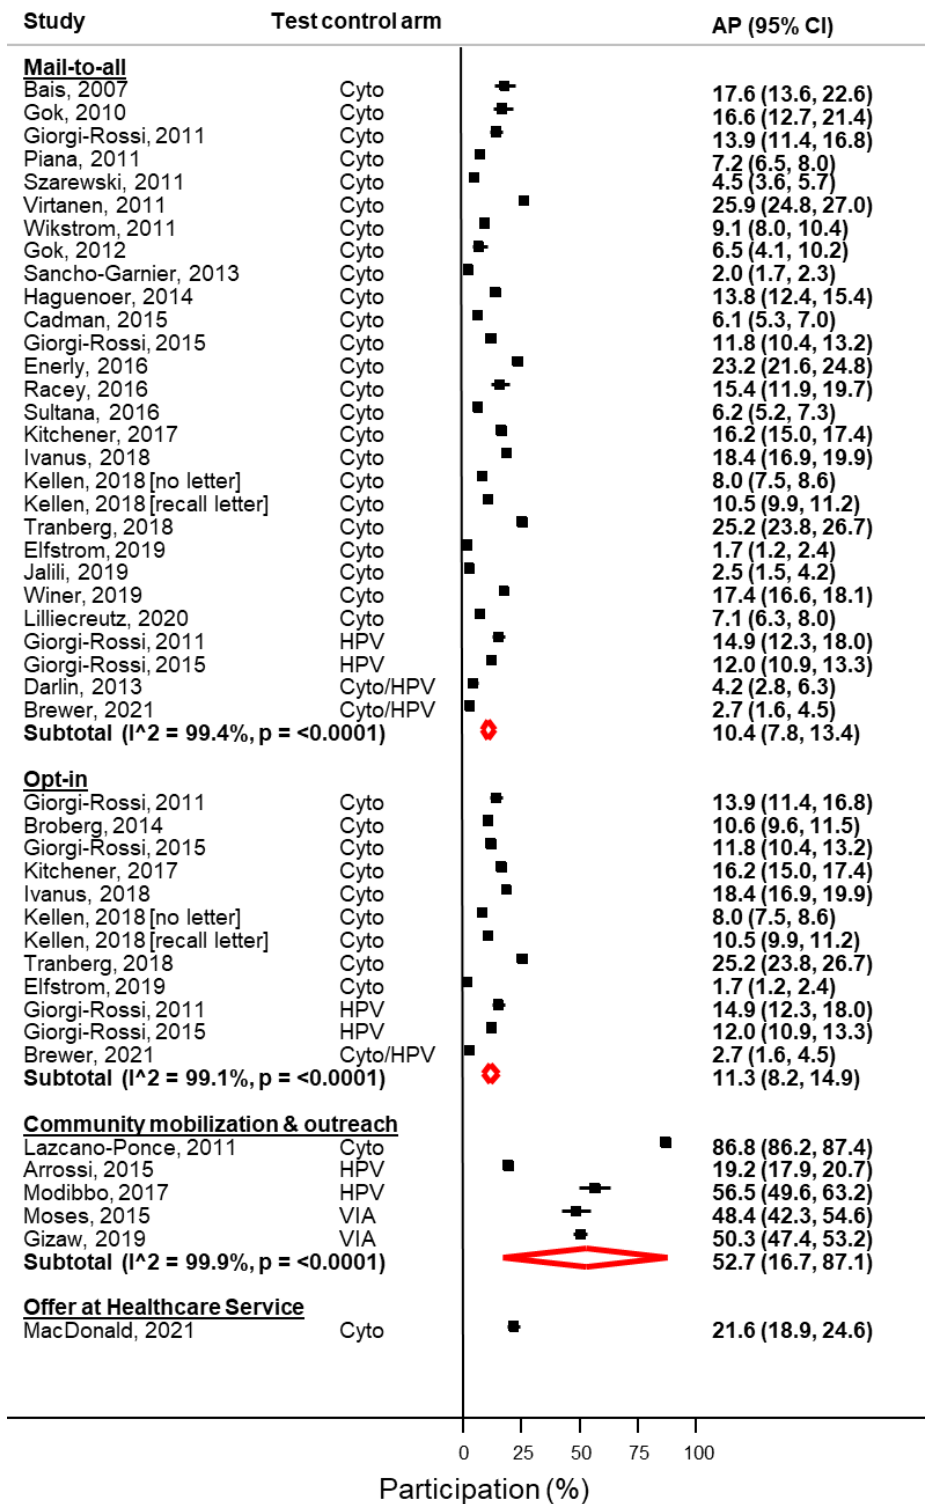

**Figure S4.** Participation in the control group according to the invitation scenario applied in the experimental groups.

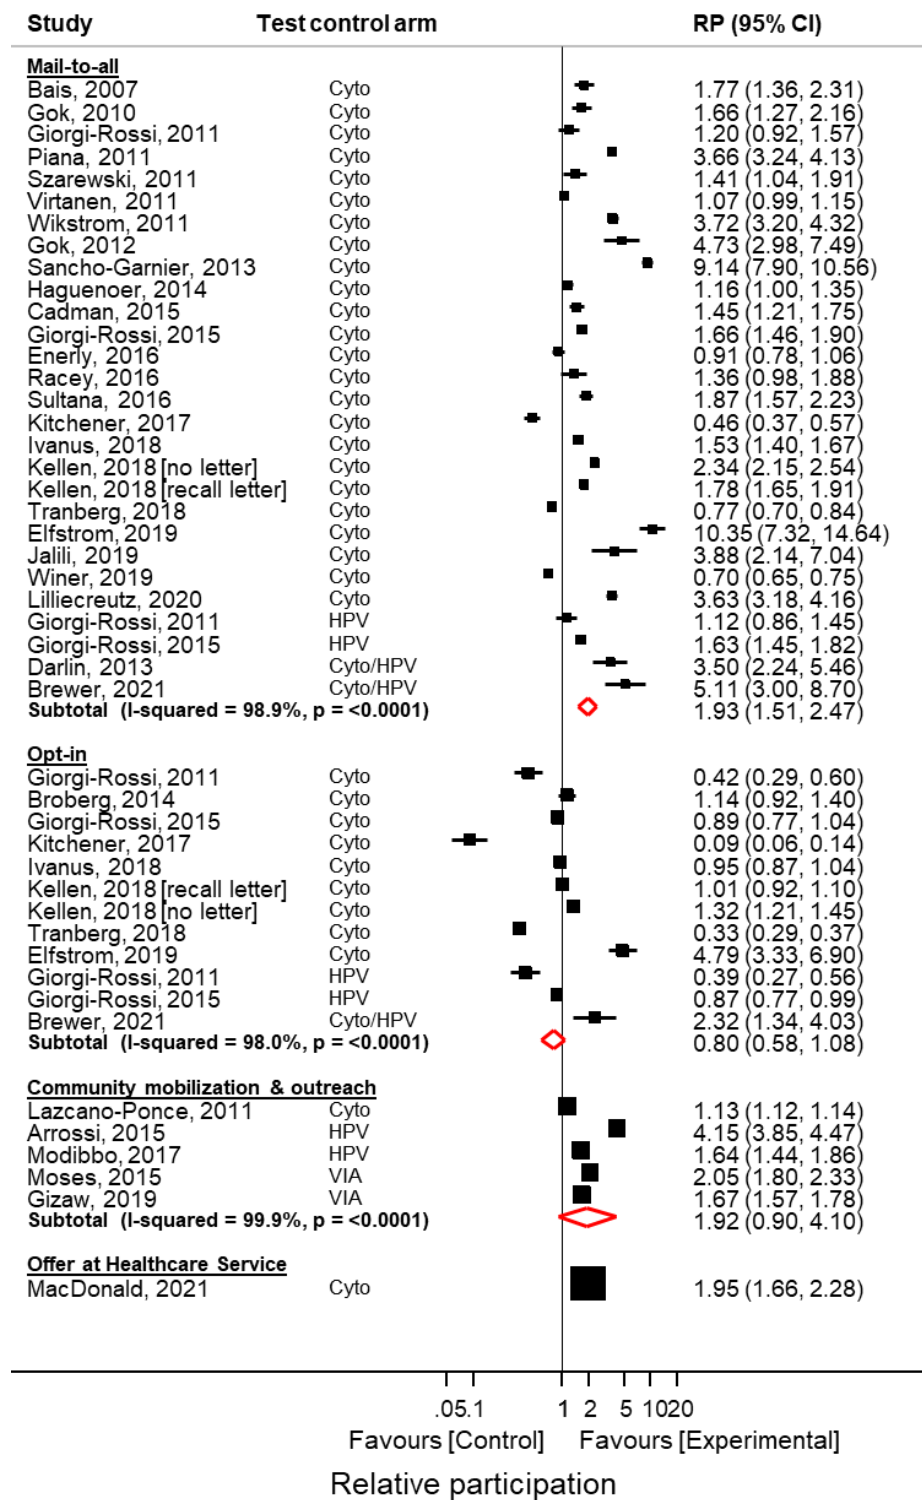

**Figure S5.** Relative participation (RP) in the experimental vs. the control groups of randomised trials: per-protocol (PP) analysis. Only hrHPV tests on self-samples were accounted for.

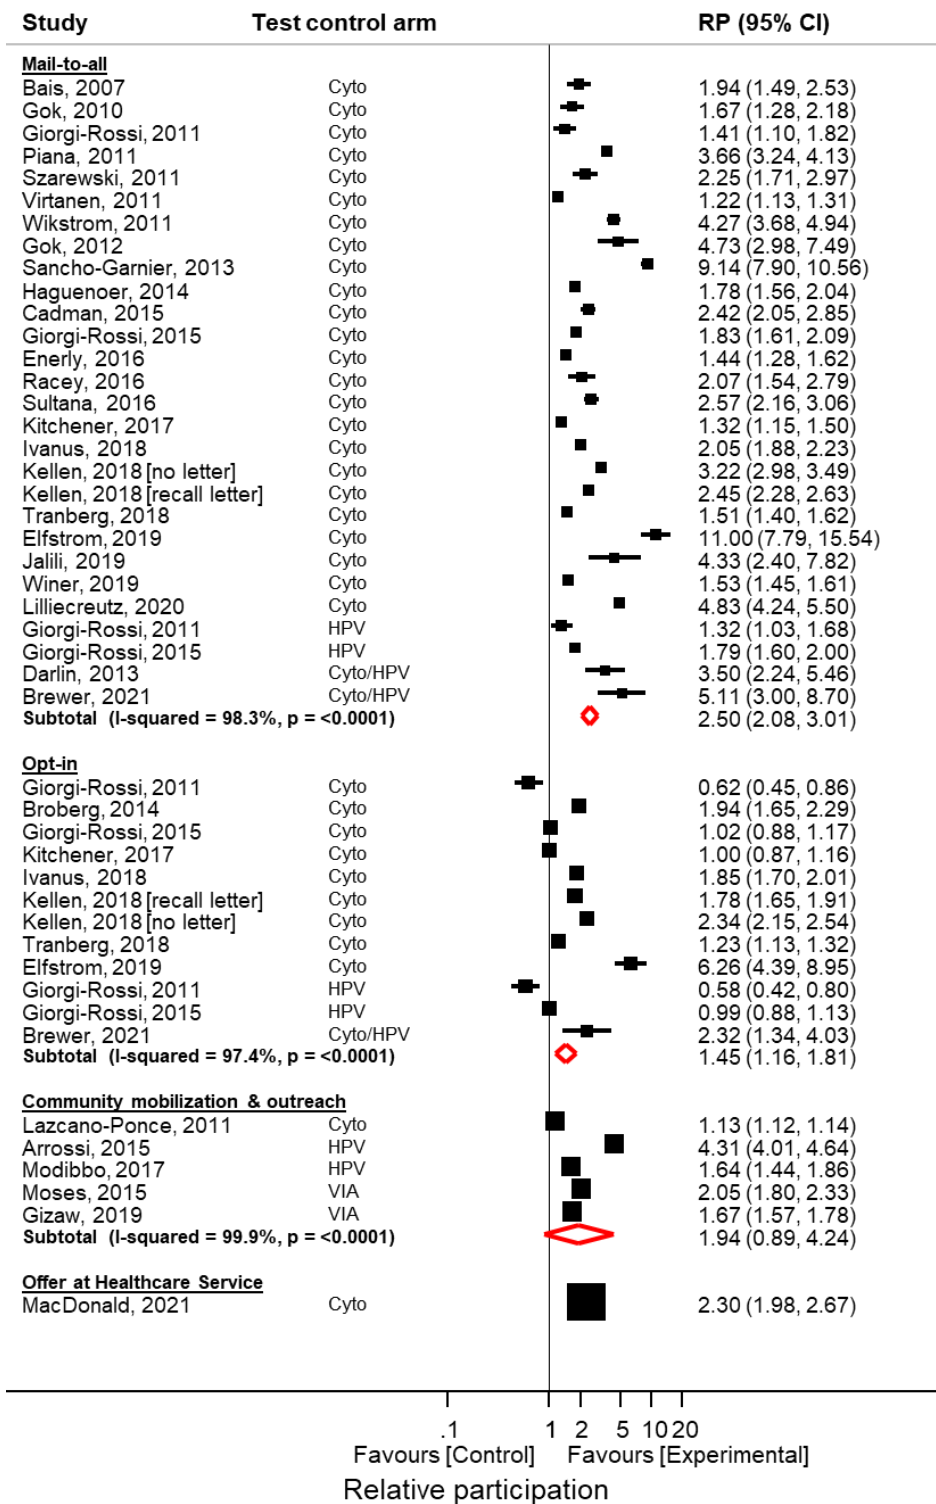

**Figure S6.** Relative participation (RP) in the experimental vs. the control groups of randomised trials: intention-to-treat (ITT) analysis. Both, hrHPV tests on self-samples and Pap smears were accounted.

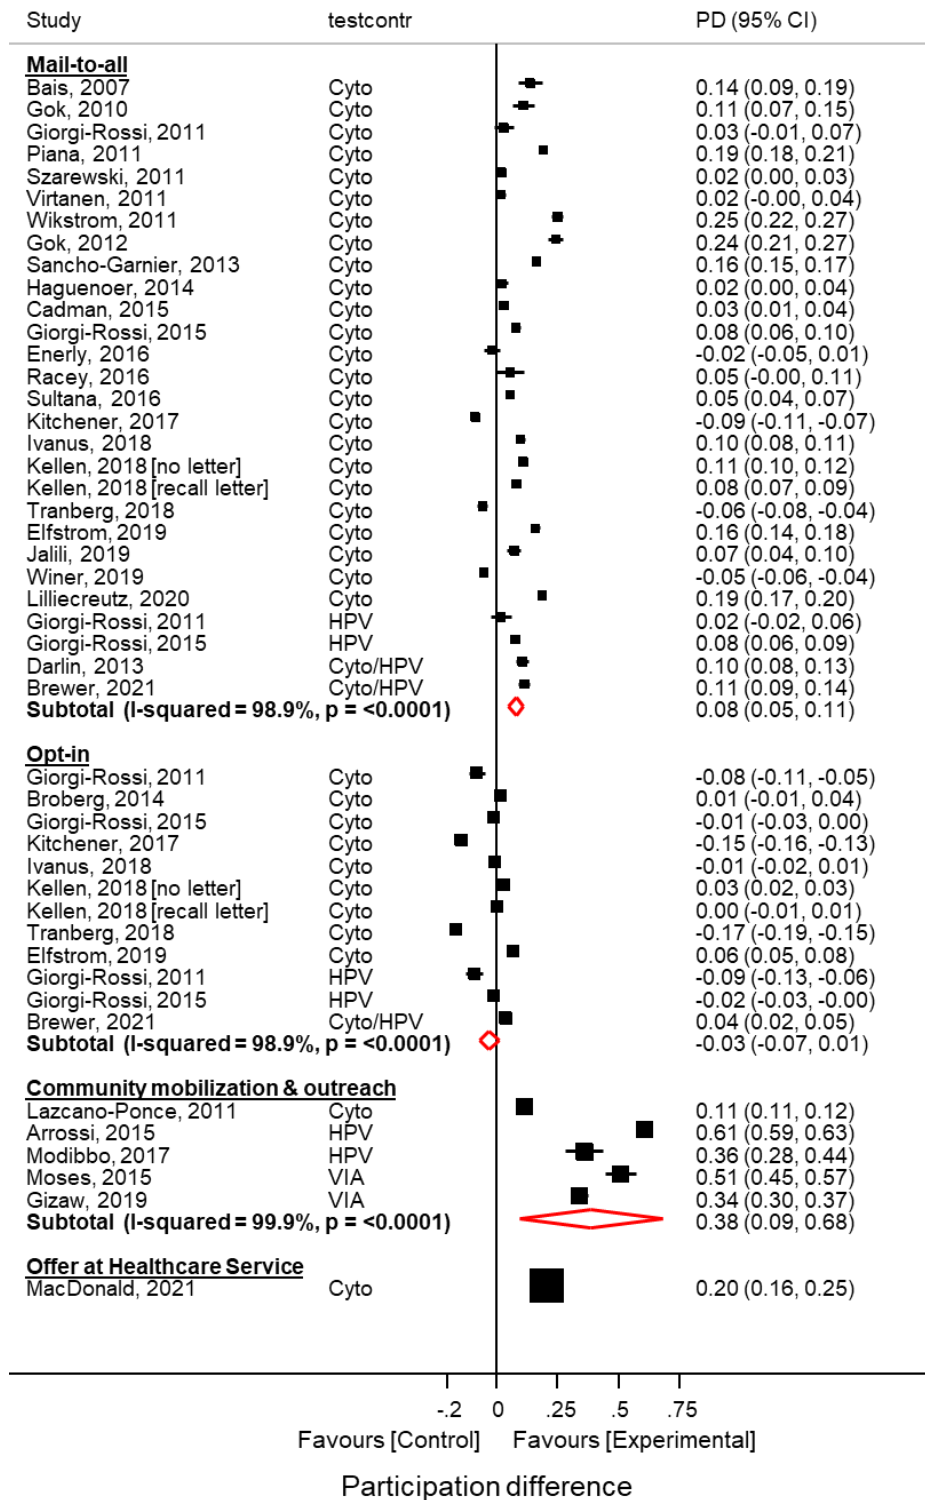

**Figure S7.** Participation difference (PD) in the experimental vs. the control groups of randomised trials: per-protocol (PP) analysis. Only hrHPV tests on self-samples were accounted for.

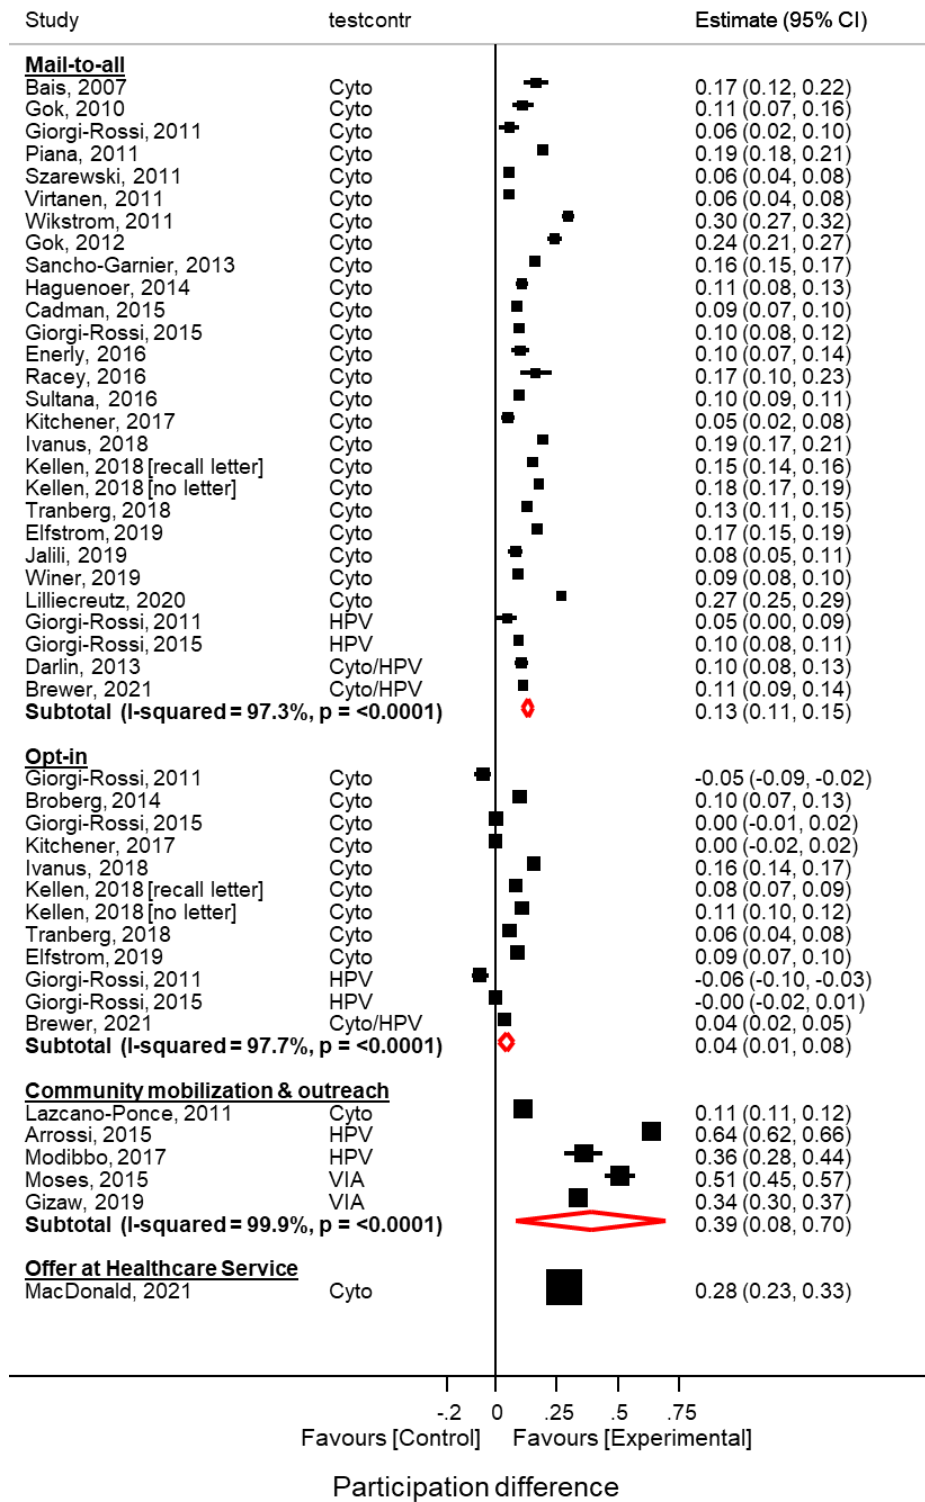

**Figure S8.** Participation difference (PD) in the experimental vs. the control groups of randomised trials: intention-to-treat (ITT) analysis. Both, hrHPV tests on self-samples and Pap smears were accounted for.

**Table S4.** Absolute proportion in self-sampling and control arm, and relative participation and participation difference in the self-sampling versus control arm, by scenario of invitation.

| Scenario of invitation            | #      | Absolute participation     |                      | Relative participation<br>(95% CI) | Participation difference<br>(95% CI) |
|-----------------------------------|--------|----------------------------|----------------------|------------------------------------|--------------------------------------|
|                                   |        | Self-sampling<br>%(95% CI) | Control<br>%(95% CI) |                                    |                                      |
| <i>Per-protocol</i>               |        |                            |                      |                                    |                                      |
| Mail-to-all                       | 25/28† | 18.8 (15.7, 22.0)          | 10.4 (7.8, 13.4)     | 1.93 (1.51, 2.47)                  | 7.8 (4.7, 10.9)                      |
| Opt-in                            | 9/12†  | 8.5 (5.6, 11.8)            | 11.3 (8.2, 14.9)     | 0.80 (0.58, 1.08)                  | -3.2 (-7.2, 0.9)                     |
| Community mobilization & outreach | 5      | 92.5 (80.3, 99.1)          | 52.7 (16.7, 87.1)    | 1.92 (0.90, 4.10)                  | 38.5 (9.3, 67.7)                     |
| Offer at healthcare service       | 1      | 42.0 (38.5, 45.6)          | 21.6 (18.9, 24.6)    | 1.95 (1.66, 2.28)                  | 20.4 (15.9, 25.0)                    |
| <i>Intention-to-treat*</i>        |        |                            |                      |                                    |                                      |
| Mail-to-all                       | 25/28† | 24.3 (21.5, 27.3)          | 10.4 (7.8, 13.4)     | 2.50 (2.08, 3.01)                  | 13.2 (11.0, 15.3)                    |
| Opt-in                            | 9/12†  | 16.7 (10.5, 23.9)          | 11.3 (8.2, 14.9)     | 1.45 (1.16, 1.81)                  | 4.4 (1.2, 7.6)                       |
| Community mobilization & outreach | 5      | 92.9 (82.3, 99.0)          | 52.7 (16.7, 87.1)    | 1.94 (0.89, 4.24)                  | 39.1 (8.4, 69.9)                     |
| Offer at healthcare service       | 1      | 49.7 (46.1, 53.3)          | 21.6 (18.9, 24.6)    | 2.30 (1.98, 2.67)                  | 28.1 (23.5, 32.7)                    |

\*Certain studies reported that certain women, allocated to the self-sampling arm, had a Pap smear taken. The sum of self-samples taken + Pap smears taken, were counted in the ITT analyses. In studies, where no such cases were reported, the number of events in the PP and ITT analyses were considered as equal.

† Number of studies. †Giorgi-Rossi, 2011 & Giorgi-Rossi, 2015 had 2 control groups (one in which Pap smear was taken by a clinician and another in which a sample for hrHPV testing was taken by a clinician). Kellen, 2018 also had 2 control arms (one with recall letters and another without recall letters).

**Table S5.** Test for publication bias (small sample effects) in the relative participation (experimental vs control groups).

| <b>Scenario</b>    | <b>Analysis</b>    | <b>Harbord's p-value</b> |
|--------------------|--------------------|--------------------------|
| <b>Mail-to-all</b> | Per-protocol       | 0.588                    |
|                    | Intention-to-treat | 0.588                    |
| <b>Opt-in</b>      | Per-protocol       | 0.859                    |
|                    | Intention-to-treat | 0.393                    |

## 7. Participation in the experimental groups: Opt-in vs. Mail-to-all

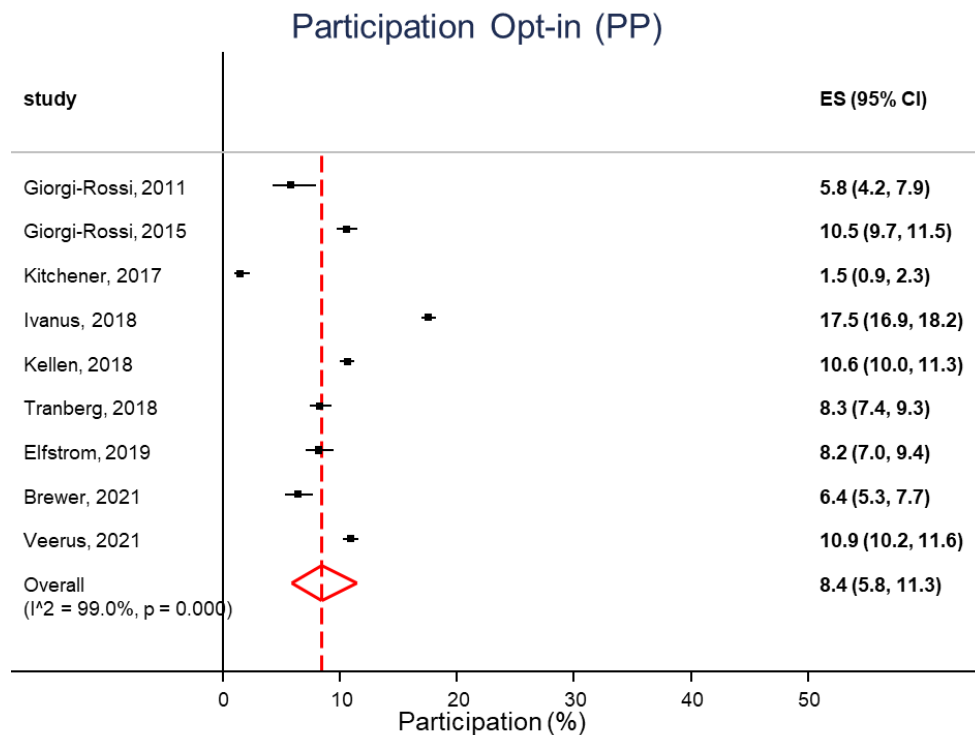

**Figure S9.** Participation rate in Opt-in invitation scenario of randomised trials with two experimental groups: per-protocol (PP) analysis. Only hrHPV tests on self-samples were accounted for.

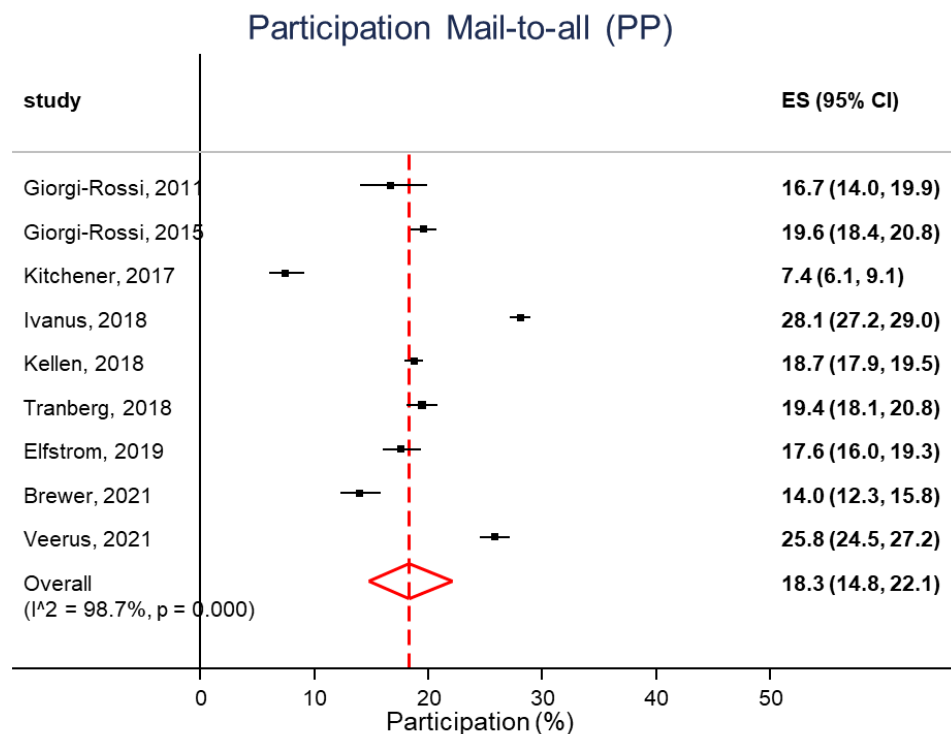

**Figure S10.** Participation rate in Mail-to-all invitation scenario of randomised trials with two experimental groups: per-protocol (PP) analysis. Only hrHPV tests on self-samples were accounted for.



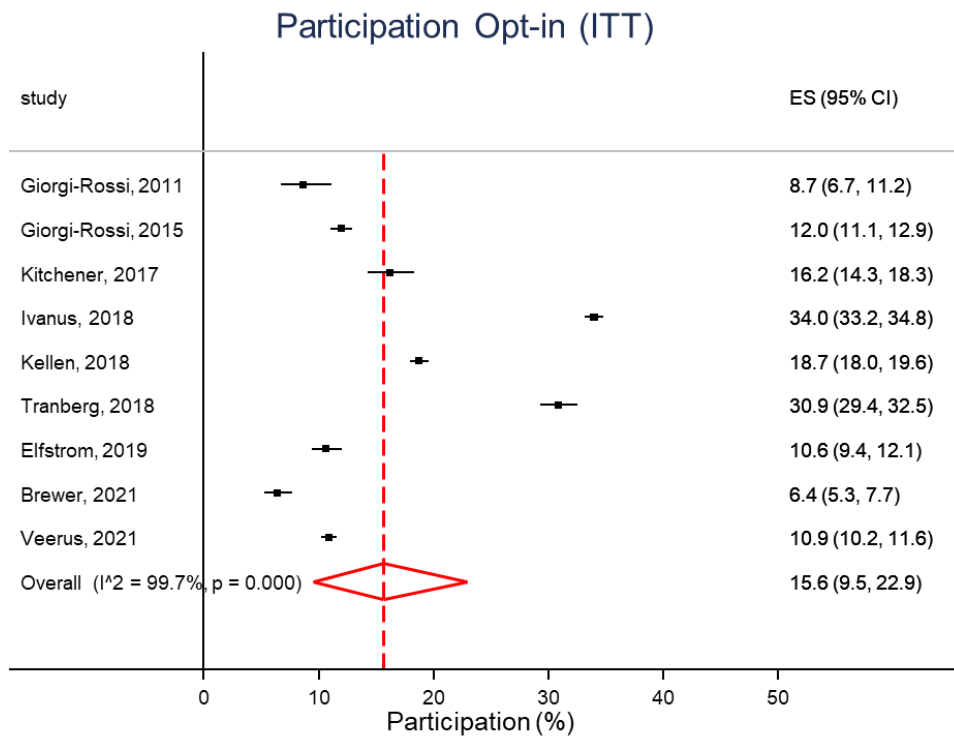

**Figure S11.** Participation rate in Opt-in invitation scenario of randomised trials with two experimental groups: intention-to-treat (ITT) analysis. Both, hrHPV tests on self-samples and Pap smears were accounted.

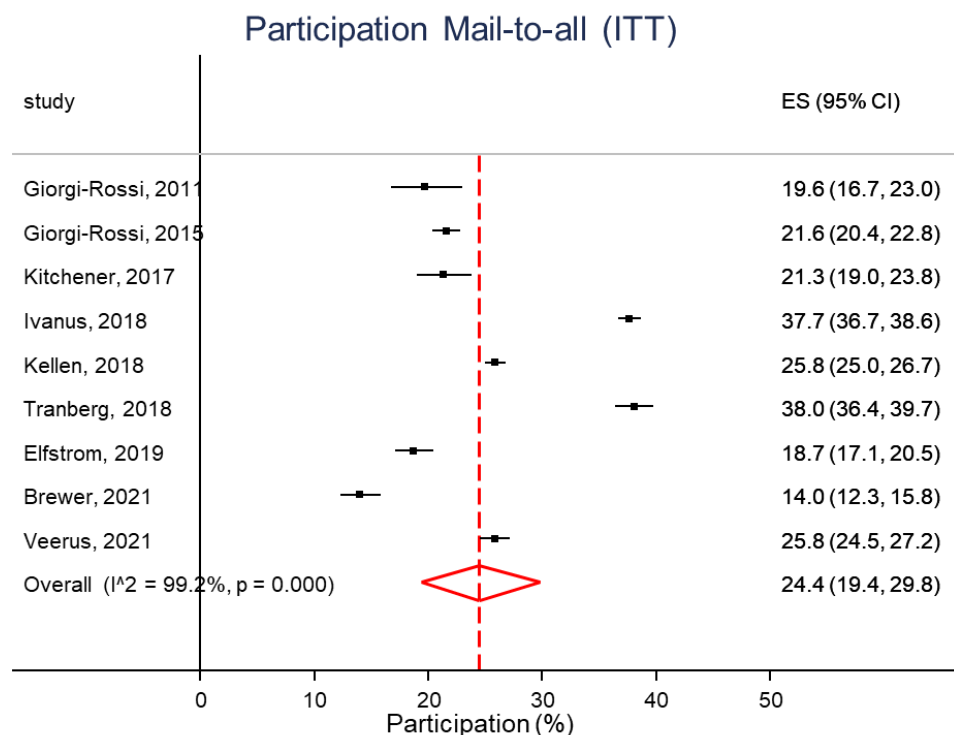

**Figure S12.** Participation rate in Mail-to-all invitation scenario of randomised trials with two experimental groups: intention-to-treat (ITT) analysis. Both, hrHPV tests on self-samples and Pap smears were accounted.

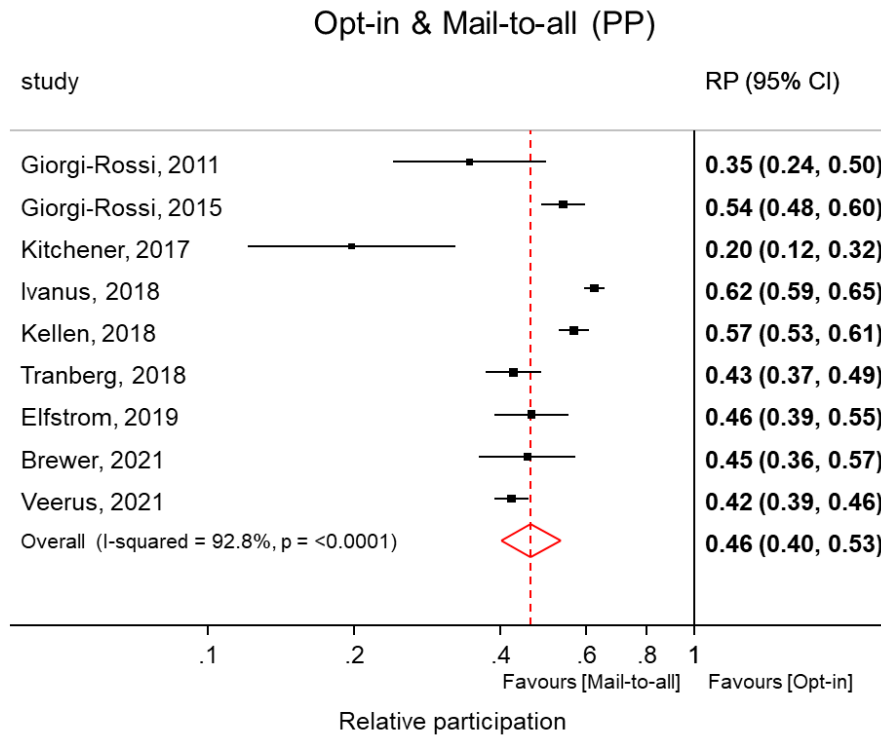

**Figure S13.** Relative participation (RP) in the Opt-in vs. Mail-to-all experimental groups of randomised trials: per-protocol (PP) analysis. Only hrHPV tests on self-samples were accounted for.

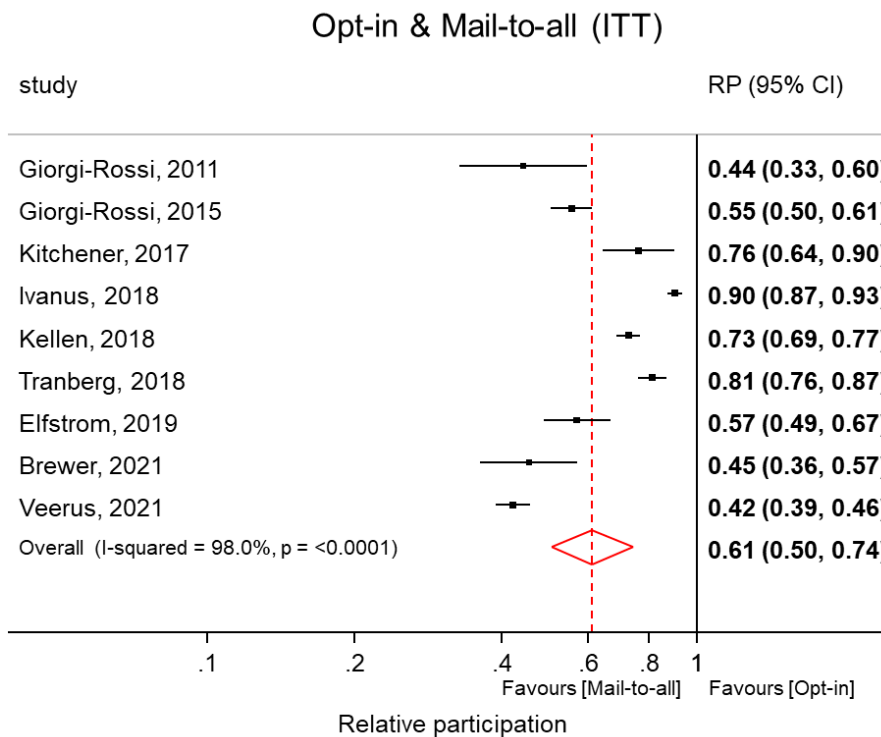

**Figure S14.** Relative participation (RP) in the Opt-in vs. Mail-to-all experimental groups of randomised trials: intention-to-treat (ITT) analysis. Both, hrHPV tests on self-samples and Pap smears were accounted for.

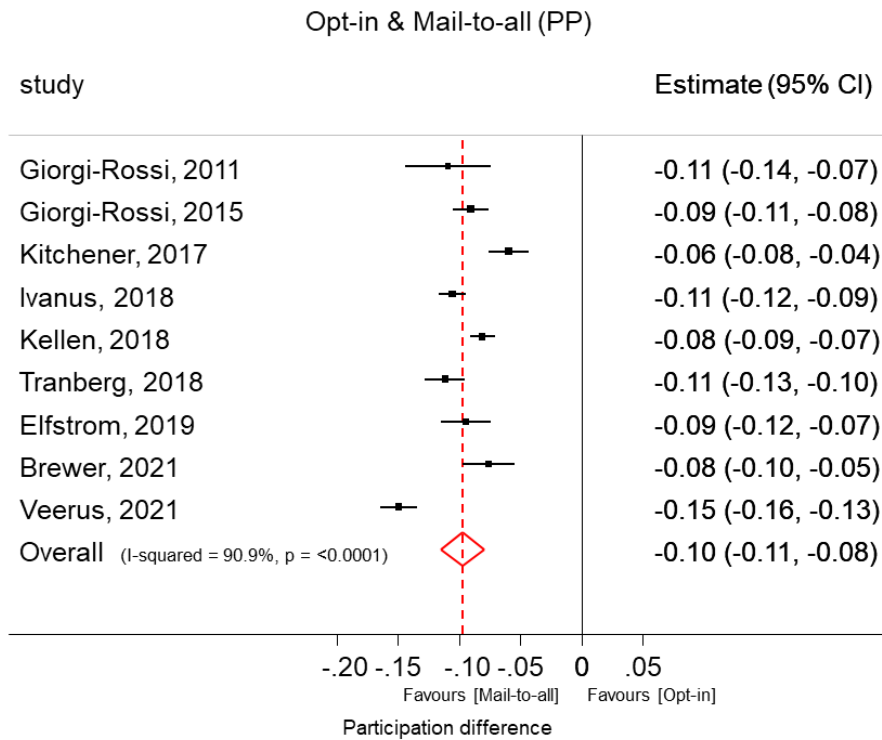

**Figure S15.** Participation difference (PD) in the Opt-in vs. Mail-to-all experimental groups of randomised trials: per-protocol (PP) analysis. Only hrHPV tests on self-samples were accounted for.

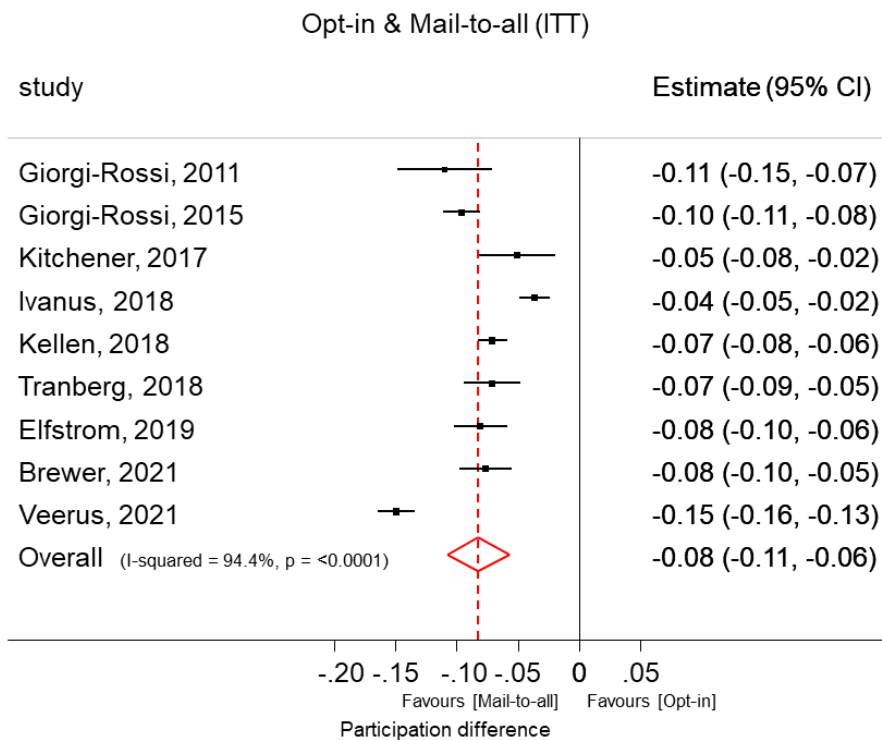

**Figure S16.** Participation difference (PD) in the Opt-in vs. Mail-to-all experimental groups of randomised trials: intention-to-treat (ITT) analysis. Both, hrHPV tests on self-samples and Pap smears were accounted for.

**Table S6.** Absolute proportion in self-sampling arm, and relative proportion and difference in the Opt-in vs. Mail-to-all self-sampling invitation scenarios.

| Analysis                   | # | Absolute participation |                        | Relative participation (95% CI) | Participation difference % (95% CI) |
|----------------------------|---|------------------------|------------------------|---------------------------------|-------------------------------------|
|                            |   | Opt-in % (95% CI)      | Mail-to-all % (95% CI) |                                 |                                     |
| <i>Per-protocol</i>        | 9 | 8.4 (5.8, 11.3)        | 18.3 (14.8, 22.1)      | 0.46 (0.40, 0.53)               | -9.7 (-11.5, -8.0)                  |
| <i>Intention-to-treat*</i> | 9 | 15.6 (9.5, 22.9)       | 24.4 (19.4, 29.8)      | 0.61 (0.50, 0.74)               | -8.2 (-10.8, -5.7)                  |

\*Certain studies reported that certain women, allocated to the self-sampling arm, had a Pap smear taken. The sum of self-samples taken + Pap smears taken, were counted in the ITT analyses. In studies, where no such cases were reported, the number of events in the PP and ITT analyses were considered as equal.

## 8. Specimen adequacy, test-positivity rate, follow-up adherence, detection of CIN2+

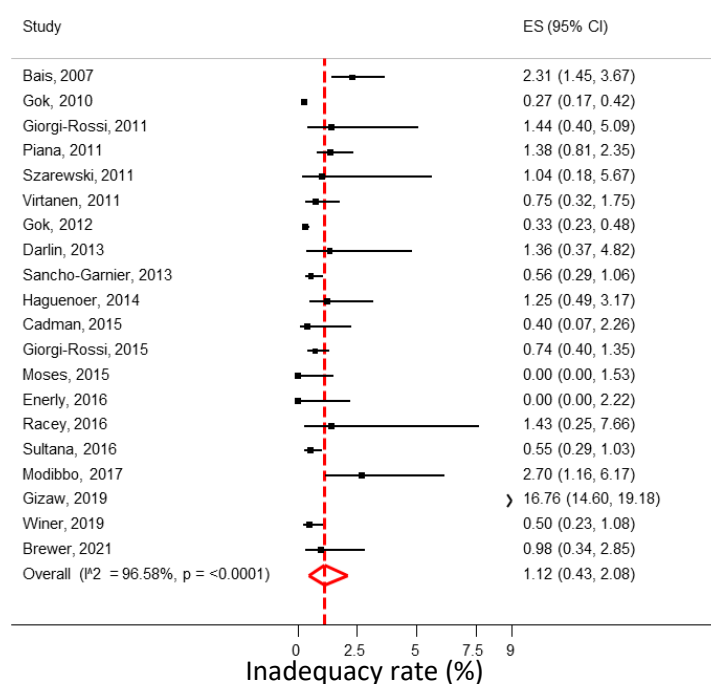

**Figure S17.** Proportion of self-samples that was inadequate for hrHPV-testing.

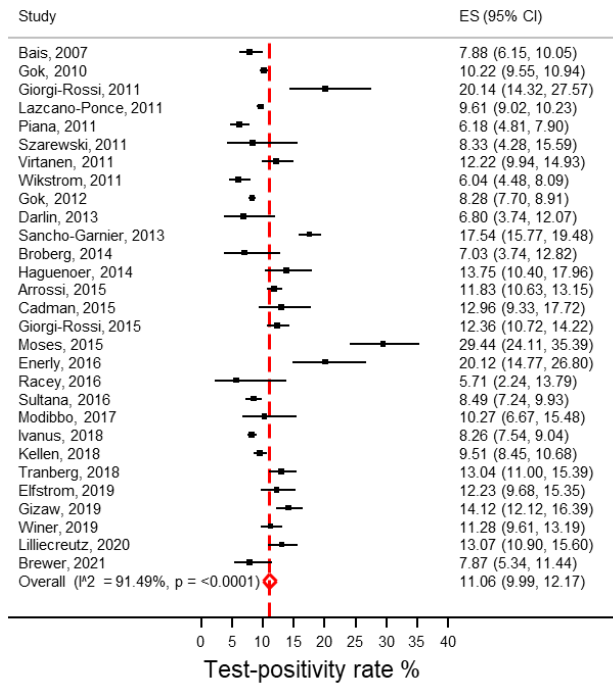

**Figure S18.** hrHPV test-positivity in self-samples (experimental arm).

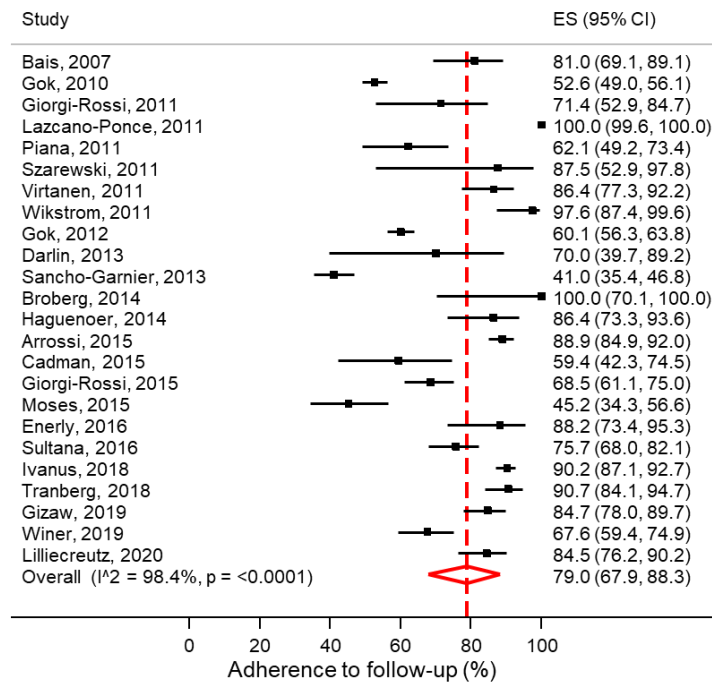

**Figure S19.** Follow-up adherence among women with a positive test result on their hrHPV self-sample (in the self-sampling arm).

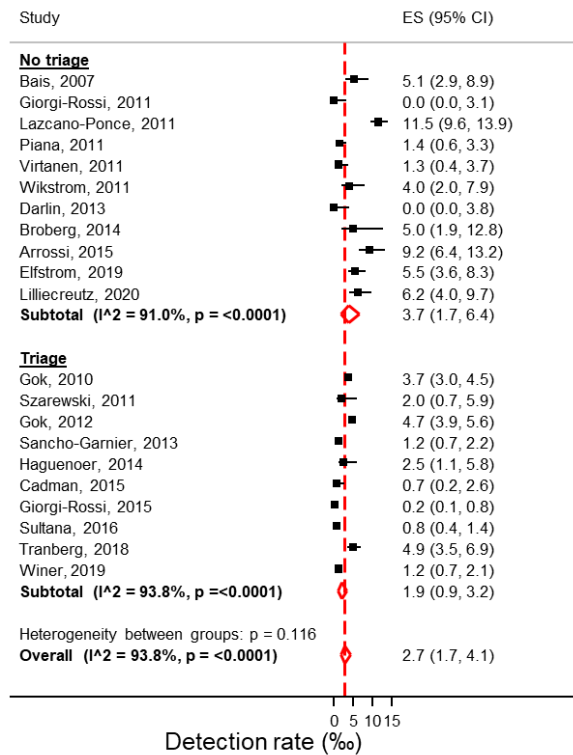

**Figure S20.** Detection of CIN2+ per 1000 invited women in the self-sampling arm, stratified by triage policy.

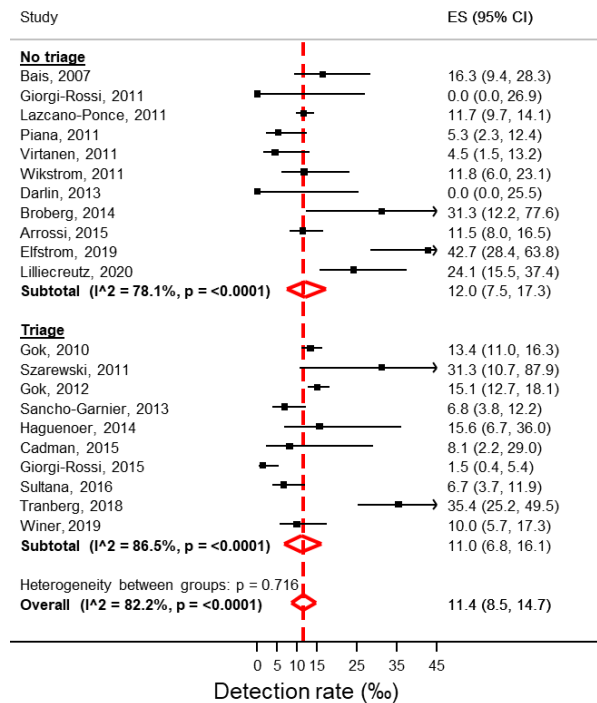

**Figure S21.** Detection of CIN2+ per 1000 screened women in the self-sampling arm, stratified by triage policy.

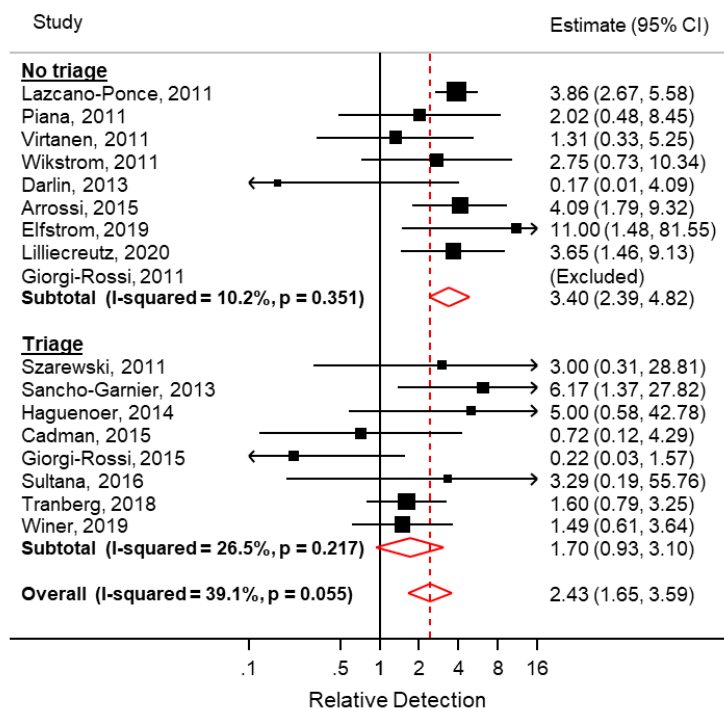

**Figure S22.** Relative detection of CIN2+ in the self- compared to the control arm among invited women, by triage policy in the self-sampling arm.

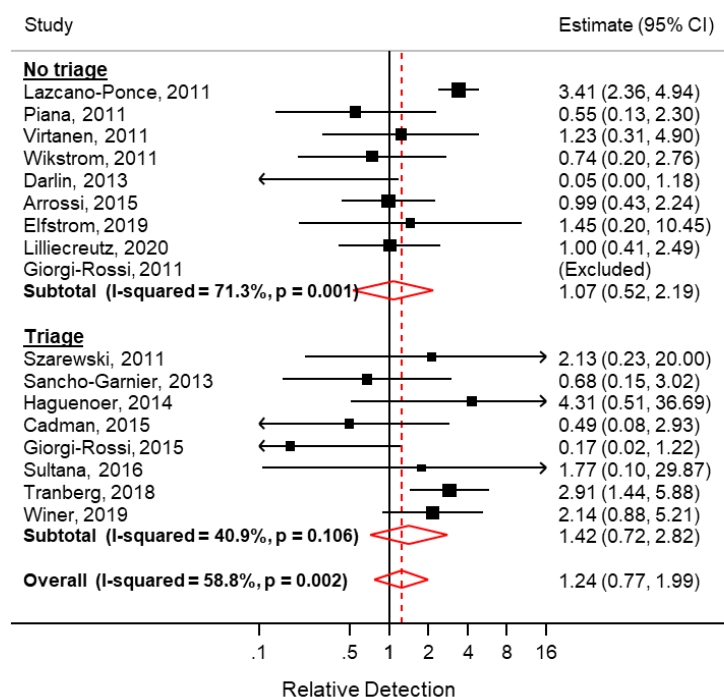

**Figure S23.** Relative detection of CIN2+ in the self-sampling compared to the control arm among screened women, by triage policy in the self-sampling arm.

**Table S7.** Absolute proportion in self-sampling arm, and relative proportion and difference in the self-sampling arm vs. control arm (cytology) for four parameters.

| Parameter               | #  | Absolute proportion self-sampling arm | #  | Relative proportion | Proportion Difference |
|-------------------------|----|---------------------------------------|----|---------------------|-----------------------|
|                         |    | (95% CI)                              |    | (95% CI)            | (95% CI)              |
| Inadequate sample       | 20 | 1.1% (0.4, 2.1%)                      | -  | -                   | -                     |
| Test-positivity*        | 29 | 11.1% (10.0, 12.2%)                   | -  | -                   | -                     |
| Compliance to follow-up | 24 | 79.0% (67.9, 88.3%)                   | 11 | 0.93 (0.84, 1.04)   | -6.7% (-17.4, 4.0%)   |
| CIN2+/1000 invited      | 21 | 2.7‰ (1.7, 3.2‰)                      | 17 | 2.43 (1.65, 3.59)   | 1.8‰ (0.6, 3.1‰)      |
| CIN2+/1000 screened     | 21 | 11.4‰ (8.5, 14.7‰)                    | 17 | 1.24 (0.77, 1.99)   | 3.3‰ (-0.4, 7.1‰)     |

\* Test-positivity of hrHPV-test in the self-sampling arm (per-protocol). # Number of studies.



## 9. References

1. Arbyn M, Smith SB, Temin S, Sultana F, Castle P. Detecting cervical precancer and reaching underscreened women by using HPV testing on self samples: updated meta-analyses. *BMJ*. 2018;363:k4823. doi:10.1136/bmj.k4823
2. Zehbe I, Jackson R, Wood B, et al. Community-randomised controlled trial embedded in the Anishinaabek Cervical Cancer Screening Study: human papillomavirus self-sampling versus Papanicolaou cytology. *BMJ Open*. 2016;6(10):e011754. doi:10.1136/bmjopen-2016-011754
3. Bais AG, van Kemenade FJ, Berkhof J, et al. Human papillomavirus testing on self-sampled cervicovaginal brushes: An effective alternative to protect nonresponders in cervical screening programs. *Int J Cancer*. 2007;120(7):1505-1510. doi:10.1002/ijc.22484
4. Gök M, Heideman DAM, van Kemenade FJ, et al. HPV testing on self collected cervicovaginal lavage specimens as screening method for women who do not attend cervical screening: cohort study. *BMJ*. 2010;340(mar11 1):c1040-c1040. doi:10.1136/bmj.c1040
5. Giorgi Rossi P, Marsili LM, Camilloni L, et al. The effect of self-sampled HPV testing on participation to cervical cancer screening in Italy: a randomised controlled trial (ISRCTN96071600). *Br J Cancer*. 2011;104(2):248-254. doi:10.1038/sj.bjc.6606040
6. Lazcano-Ponce E, Lorincz AT, Cruz-Valdez A, et al. Self-collection of vaginal specimens for human papillomavirus testing in cervical cancer prevention (MARCH): a community-based randomised controlled trial. *Lancet*. 2011;378(9806):1868-1873. doi:10.1016/S0140-6736(11)61522-5
7. Piana L, Leandri FX, Le RL, Heid P, Tamalet C, Sancho-Garnier H. L'auto-prélèvement vaginal à domicile pour recherche de papilloma virus à haut risque. Une solution de remplacement pour les femmes ne participant pas au dépistage cytologique des cancers du col de l'utérus. Campagne expérimentale du département des Bouches-duRhône. *Bull Cancer*. 2011;(98):723-731.
8. Szarewski A, Cadman L, Mesher D, et al. HPV self-sampling as an alternative strategy in non-attenders for cervical screening – a randomised controlled trial. *Br J Cancer*. 2011;104(6):915-920. doi:10.1038/bjc.2011.48
9. Virtanen A, Nieminen P, Luostarinen T, Anttila A. Self-sample HPV Tests As an Intervention for Nonattendees of Cervical Cancer Screening in Finland: a Randomized Trial. *Cancer Epidemiol Biomarkers Prev*. 2011;20(9):1960-1969. doi:10.1158/1055-9965.EPI-11-0307
10. Wikström I, Lindell M, Sanner K, Wilander E. Self-sampling and HPV testing or ordinary Pap-smear in women not regularly attending screening: a randomised study. *Br J Cancer*. 2011;105(3):337-339. doi:10.1038/bjc.2011.236
11. Gök M, van Kemenade FJ, Heideman DAM, et al. Experience with high-risk human papillomavirus testing on vaginal brush-based self-samples of non-attendees of the cervical screening program. *Int J Cancer*. 2012;130(5):1128-1135. doi:10.1002/ijc.26128
12. Darlin L, Borgfeldt C, Forslund O, et al. Comparison of use of vaginal HPV self-sampling and offering flexible appointments as strategies to reach long-term non-attending women in organized cervical screening. *J Clin Virol*. 2013;58(1):155-160. doi:10.1016/j.jcv.2013.06.029
13. Sancho-Garnier H, Tamalet C, Halfon P, et al. HPV self-sampling or the Pap-smear: A randomized study among cervical screening nonattenders from lower socioeconomic groups in France: HPV self-sampling or the Pap-smear for screening among nonattenders women? *Int J Cancer*. Published online May 2013:n/a-n/a. doi:10.1002/ijc.28283

14. Broberg G, Gyrð-Hansen D, Miao Jonasson J, et al. Increasing participation in cervical cancer screening: offering a HPV self-test to long-term non-attendees as part of RACOMIP, a Swedish randomized controlled trial. *Int J Cancer*. 2014;134(9):2223-2230. doi:10.1002/ijc.28545
15. Haguenoer K, Sengchanh S, Gaudy-Graffin C, et al. Vaginal self-sampling is a cost-effective way to increase participation in a cervical cancer screening programme: a randomised trial. *Br J Cancer*. 2014;111(11):2187-2196. doi:10.1038/bjc.2014.510
16. Arrossi S, Thouyaret L, Herrero R, et al. Effect of self-collection of HPV DNA offered by community health workers at home visits on uptake of screening for cervical cancer (the EMA study): a population-based cluster-randomised trial. *Lancet Glob Health*. 2015;3(2):e85-e94. doi:10.1016/S2214-109X(14)70354-7
17. Cadman L, Wilkes S, Mansour D, et al. A randomized controlled trial in non-responders from Newcastle upon Tyne invited to return a self-sample for Human Papillomavirus testing versus repeat invitation for cervical screening. *J Med Screen*. 2015;22(1):28-37. doi:10.1177/0969141314558785
18. Giorgi Rossi P, Fortunato C, Barbarino P, et al. Self-sampling to increase participation in cervical cancer screening: an RCT comparing home mailing, distribution in pharmacies, and recall letter. *Br J Cancer*. 2015;112(4):667-675. doi:10.1038/bjc.2015.11
19. Moses E, Pedersen HN, Mitchell SM, et al. Uptake of community-based, self-collected HPV testing vs. visual inspection with acetic acid for cervical cancer screening in Kampala, Uganda: preliminary results of a randomised controlled trial. *Trop Med Int Health*. 2015;20(10):1355-1367. doi:10.1111/tmi.12549
20. Enerly E, Bonde J, Schee K, Pedersen H, Lönnberg S, Nygård M. Self-Sampling for Human Papillomavirus Testing among Non-Attendees Increases Attendance to the Norwegian Cervical Cancer Screening Programme. *PloS One*. 2016;11(4):e0151978. doi:10.1371/journal.pone.0151978
21. Racey CS, Gesink DC, Burchell AN, Trivers S, Wong T, Rebbapragada A. Randomized Intervention of Self-Collected Sampling for Human Papillomavirus Testing in Under-Screened Rural Women: Uptake of Screening and Acceptability. *J Womens Health*. 2016;25(5):489-497. doi:10.1089/jwh.2015.5348
22. Sultana F, English DR, Simpson JA, et al. Home-based HPV self-sampling improves participation by never-screened and under-screened women: Results from a large randomized trial (iPap) in Australia: Home-Based HPV Self-Sampling in Never- and Under-Screened Women. *Int J Cancer*. 2016;139(2):281-290. doi:10.1002/ijc.30031
23. Kitchener H, Gittins M, Cruickshank M, et al. A cluster randomized trial of strategies to increase uptake amongst young women invited for their first cervical screen: The STRATEGIC trial. *J Med Screen*. 2018;25(2):88-98. doi:10.1177/0969141317696518
24. Modibbo F, Iregbu KC, Okuma J, et al. Randomized trial evaluating self-sampling for HPV DNA based tests for cervical cancer screening in Nigeria. *Infect Agent Cancer*. 2017;12(1):11. doi:10.1186/s13027-017-0123-z
25. Kellen E, Benoy I, Vanden Broeck D, et al. A randomized, controlled trial of two strategies of offering the home-based HPV self-sampling test to non- participants in the Flemish cervical cancer screening program: Home-based HPV self-sampling test. *Int J Cancer*. 2018;143(4):861-868. doi:10.1002/ijc.31391
26. Tranberg M, Bech BH, Blaakær J, Jensen JS, Svanholm H, Andersen B. Preventing cervical cancer using HPV self-sampling: direct mailing of test-kits increases screening participation more than timely opt-in procedures - a randomized controlled trial. *BMC Cancer*. 2018;18(1):273. doi:10.1186/s12885-018-4165-4
27. Ivanus U, Jerman T, Fokter AR, et al. Randomised trial of HPV self-sampling among non-attendees in the Slovenian cervical screening programme ZORA: comparing three different screening approaches. *Radiol Oncol*. 2018;52(4):399-412. doi:10.2478/raon-2018-0036

28. Elfström KM, Sundström K, Andersson S, et al. Increasing participation in cervical screening by targeting long-term nonattenders: Randomized health services study. *Int J Cancer*. 2019;145(11):3033-3039. doi:10.1002/ijc.32374
29. Gizaw M, Teka B, Ruddies F, et al. Uptake of Cervical Cancer Screening in Ethiopia by Self-Sampling HPV DNA Compared to Visual Inspection with Acetic Acid: A Cluster Randomized Trial. *Cancer Prev Res Phila Pa*. 2019;12(9):609-616. doi:10.1158/1940-6207.CAPR-19-0156
30. Jalili F, O'Conaill C, Templeton K, et al. Assessing the Impact of Mailing Self-Sampling Kits for Human Papillomavirus Testing to Unscreened Non-Responder Women in Manitoba. *Curr Oncol*. 2019;26(3):167-172. doi:10.3747/co.26.4575
31. Winer RL, Lin J, Tiro JA, et al. Effect of Mailed Human Papillomavirus Test Kits vs Usual Care Reminders on Cervical Cancer Screening Uptake, Precancer Detection, and Treatment: A Randomized Clinical Trial. *JAMA Netw Open*. 2019;2(11):e1914729. doi:10.1001/jamanetworkopen.2019.14729
32. Lilliecreutz C, Karlsson H, Spetz Holm AC. Participation in interventions and recommended follow-up for non-attendees in cervical cancer screening -taking the women's own preferred test method into account-A Swedish randomised controlled trial. *PLoS One*. 2020;15(7):e0235202. doi:10.1371/journal.pone.0235202
33. MacDonald EJ, Geller S, Sibanda N, et al. Reaching under-screened/never-screened indigenous peoples with human papilloma virus self-testing: A community-based cluster randomised controlled trial. *Aust N Z J Obstet Gynaecol*. 2021;61(1):135-141. doi:10.1111/ajo.13285
34. Brewer N, Bartholomew K, Grant J, et al. Acceptability of human papillomavirus (HPV) self-sampling among never- and under-screened Indigenous and other minority women: a randomised three-arm community trial in Aotearoa New Zealand. *Lancet Reg Health West Pac*. 2021;16:100265. doi:10.1016/j.lanwpc.2021.100265
35. Veerus P, Hallik R, Jänes J, et al. Human papillomavirus self-sampling for long-term non-attenders in cervical cancer screening: A randomised feasibility study in Estonia. *J Med Screen*. 2022;29(1):53-60. doi:10.1177/09691413211052499
36. Higgins JPT, Altman DG, Gotzsche PC, et al. The Cochrane Collaboration's tool for assessing risk of bias in randomised trials. *BMJ*. 2011;343:d5928. doi:10.1136/bmj.d5928
